# Supplementary material for: Non-parent of Origin Expression of Numerous Effector Genes Indicates a Role of Gene Regulation in Host Adaption of the Hybrid Triticale Powdery Mildew Pathogen
Source: Front Plant Sci. 2018 Jan 30;9:49. doi: 10.3389/fpls.2018.00049 (PMC5797619; doi:10.3389/fpls.2018.00049)
Supplement: Supplementary file 2 [file Table4.xlsx]

## Sheet: Supp.Table4
Geneid1	E-Value2	Bitscore3	Short name4	Superfamily5	Functional group6	Description NCBI7
Bgt-1741	1.53e-58	179.219	DUF1993	cl01567	_	Domain of unknown function (DUF1993).
Bgt-1906	8.89e-72	212.731	DUF1993	cl01567	_	Domain of unknown function (DUF1993).
Bgt-1090	1.48e-44	141.21	MPC superfamily	cl04196	_	Uncharacterized protein family (UPF0041)
Bgt-1240	5.78e-22	80.8475	DUF543	cl04505	_	Domain of unknown function (DUF543). This family of short eukaryotic proteins has no known function. Most of the members of this family are only 80 amino acid residues long. However the Arabidopsis homolog is over 300 residues long. The presumed domain contains a conserved amino terminal cysteine and a conserved motif GXGXGXG in the carboxy terminal half that may be functionally important.
Bgt-3378-2	4.09e-88	264.761	DUF1793	cl08491	_	Domain of unknown function (DUF1793). This presumed domain is found at the C-terminus of a glutaminase protein from fungi. This domain is also found as a single domain protein in Bacteroides thetaiotaomicron.
Bgt-3732	1.11e-29	99.1843	DUF2611	cl12591	_	Protein of unknown function (DUF2611)
Bgt-3378	5.6e-05	40.7995	DUF4964 superfamily	cl24792	_	Domain of unknown function (DUF4964)
Bgt-3378-2	1.49e-107	314.427	DUF4965	cl24793	_	Domain of unknown function (DUF4965)
Bgt-2865	3.44e-06	44.2152	DUF2076 superfamily	cl26593	_	Uncharacterized protein conserved in bacteria (DUF2076)
Bgt-3477	3.99e-46	146.163	ADF_cofilin_like	cl15697	Actin	Actin depolymerization factor/cofilin- and gelsolin-like domains. Actin depolymerization factor/cofilin-like domains are present in a family of essential eukaryotic actin regulatory proteins; these proteins enhance the turnover rate of actin and interact with actin monomers as well as actin filaments.
Bgt-2237	7.21e-12	56.5614	ATP-synt_C	cl00466	ATP	ATP synthase subunit C
Bgt-435	2.55e-09	51.0034	ATP-synt_C superfamily	cl00466	ATP	ATP synthase subunit C
Bgt-2237	1.4e-46	146.763	V_ATP_synt_C	cl00466	ATP	ATP synthase subunit C
Bgt-2455	6.63e-14	60.9636	ATP-synt_E	cl05315	ATP	ATP synthase E chain. This family consists of several ATP synthase E chain sequences which are components of the CF(0) subunit.
Bgt-4025	2.64e-12	61.0971	Mt_ATP-synt_D superfamily	cl05445	ATP	ATP synthase D chain, mitochondrial (ATP5H). This family consists of several ATP synthase D chain, mitochondrial (ATP5H) proteins. Subunit d has no extensive hydrophobic sequences, and is not apparently related to any subunit described in the simpler ATP synthases in bacteria and chloroplasts.
Bgt-3089	5.56e-24	87.2904	ATP_sub_h	cl11368	ATP	ATP synthase complex subunit h. Subunit h is a component of the yeast mitochondrial F1-F0 ATP synthase. It is essential for the correct assembly and functioning of this enzyme. Subunit h occupies a central place in the peripheral stalk between the F1 sector and the membrane.
Bgt-2799	1.25e-44	146.891	OSCP	cl17210	ATP	ATP synthase delta (OSCP) subunit. The ATP D subunit from E. coli is the same as the OSCP subunit which is this family. The ATP D subunit from metazoa are found in family pfam00401.
Bgt-4968	5.7e-53	168.606	Mt_ATP-synt_B	cl21478	ATP	ATP synthase B/B' CF(0). Part of the CF(0) (base unit) of the ATP synthase. The base unit is thought to translocate protons through membrane (inner membrane in mitochondria, thylakoid membrane in plants, cytoplasmic membrane in bacteria). The B subunits are thought to interact with the stalk of the CF(1) subunits. This domain should not be confused with the ab CF(1) proteins (in the head of the A…
Bgt-4027	1.52e-55	175.646	vATP-synt_E	cl23750	ATP	ATP synthase (E/31 kDa) subunit. This family includes the vacuolar ATP synthase E subunit, as well as the archaebacterial ATP synthase E subunit.
Bgt-3029	3.27e-22	80.2574	ATP_synt_H	cl07862	ATP	ATP synthase subunit H. ATP synthase subunit H is an extremely hydrophobic of approximately 9 kDa. This subunit may be required for assembly of vacuolar ATPase.
Bgt-4216	1.84e-90	270.155	ATP-synt	cl00365	ATPase	The F-ATPase is found in bacterial plasma membranes, mitochondrial inner membranes and in chloroplast thylakoid membranes. It has also been found in the archaea Methanosarcina barkeri. It uses a proton gradient to drive ATP synthesis and hydrolyzes ATP to build the proton gradient. The extrinisic membrane domain of F-ATPases is composed of alpha, beta, gamma, delta, and epsilon (not present in ba…
Bgt-4747	1e-119	377.746	Uup	cl28181	ATPase	ATPases associated with a variety of cellular activities. AAA - ATPases associated with a variety of cellular activities. This profile/alignment only detects a fraction of this vast family. The poorly conserved N-terminal helix is missing from the alignment.
Bgt-397	1.4e-29	113.786	Glyco_hydro_1 superfamily	cl23725	Carbohydrates metabolism	Glycosyl hydrolase family 1
Bgt-1303	4.84e-176	494.587	Glyco_hydro_72	cl23725	Carbohydrates metabolism	Glycosyl hydrolase family 1
Bgt-1778	1.14e-85	245.97	PTZ00018	cl23735	Carbohydrates metabolism	Glycosyl hydrolase family 1
Bgt-742	1.14e-85	245.97	PTZ00018	cl23735	Carbohydrates metabolism	Glycosyl hydrolase family 1
Bgt-1297	0	1118.72	HSP70 superfamily	cl26953	chaprone	Hsp70 chaperones help to fold many proteins. Hsp70 assisted folding involves repeated cycles of substrate binding and release. Hsp70 activity is ATP dependent. Hsp70 proteins are made up of two regions: the amino terminus is the ATPase domain and the carboxyl terminus is the substrate binding region.
Bgt-20037	0	577.902	HSP70 superfamily	cl26953	chaprone	Hsp70 chaperones help to fold many proteins. Hsp70 assisted folding involves repeated cycles of substrate binding and release. Hsp70 activity is ATP dependent. Hsp70 proteins are made up of two regions: the amino terminus is the ATPase domain and the carboxyl terminus is the substrate binding region.
Bgt-2733-2	0	882.516	HSP70 superfamily	cl26953	chaprone	Hsp70 chaperones help to fold many proteins. Hsp70 assisted folding involves repeated cycles of substrate binding and release. Hsp70 activity is ATP dependent. Hsp70 proteins are made up of two regions: the amino terminus is the ATPase domain and the carboxyl terminus is the substrate binding region.
Bgt-5515	6.16e-05	38.237	HSP70 superfamily	cl26953	chaprone	Hsp70 chaperones help to fold many proteins. Hsp70 assisted folding involves repeated cycles of substrate binding and release. Hsp70 activity is ATP dependent. Hsp70 proteins are made up of two regions: the amino terminus is the ATPase domain and the carboxyl terminus is the substrate binding region.
Bgt-3499	3.58e-47	147.151	Cyc7	cl21467	Cytochrome	Cytochrome c. The Pfam entry does not include all Prosite members. The cytochrome 556 and cytochrome c' families are not included. All these are now in a new clan together. The C-terminus of DUF989, pfam06181, has now been merged into this family.
Bgt-5000	1.05e-144	406.184	Cytochrom_C1	cl21467	Cytochrome	Cytochrome c. The Pfam entry does not include all Prosite members. The cytochrome 556 and cytochrome c' families are not included. All these are now in a new clan together. The C-terminus of DUF989, pfam06181, has now been merged into this family.
Bgt-2168	2.07e-19	81.8962	Cyt-b5	cl02041	Cytochrome	Cytochrome b5-like Heme/Steroid binding domain. This family includes heme binding domains from a diverse range of proteins. This family also includes proteins that bind to steroids. The family includes progesterone receptors. Many members of this subfamily are membrane anchored by an N-terminal transmembrane alpha helix. This family also includes a domain in some chitin synthases. There is no kno…
Bgt-3287	1.9e-35	114.713	Cyt_c_Oxidase_VIb	cl02794	Cytochrome	Cyt_c_Oxidase_VIb Superfamily .Cytochrome c oxidase subunit VIb. Cytochrome c oxidase (CcO), the terminal oxidase in the respiratory chains of eukaryotes and most bacteria, is a multi-chain transmembrane protein located in the inner membrane of mitochondria and the cell membrane of prokaryotes. It catalyzes the reduction of O2 and simultaneously pumps protons across the membrane. The number of su…
Bgt-3488	2.93e-19	72.5743	COX7a	cl02796	Cytochrome	Cyt_c_Oxidase_VIIa Superfamily . Cytochrome c oxidase subunit VIIa. Cytochrome c oxidase (CcO), the terminal oxidase in the respiratory chains of eukaryotes and most bacteria, is a multi-chain transmembrane protein located in the inner membrane of mitochondria and the cell membrane of prokaryotes. It catalyzes the reduction of O2 and simultaneously pumps protons across the membrane. The number of…
Bgt-2825	2.03e-17	68.4504	COX7C	cl02797	Cytochrome	Cyt_c_Oxidase_VIIc Superfamily. Cytochrome c oxidase subunit VIIc. Cytochrome c oxidase (CcO), the terminal oxidase in the respiratory chains of eukaryotes and most bacteria, is a multi-chain transmembrane protein located in the inner membrane of mitochondria and the cell membrane of prokaryotes. It catalyzes the reduction of O2 and simultaneously pumps protons across the membrane. The number of …
Bgt-1742	1.31e-57	173.128	UCR_14kD	cl03509	Cytochrome	Ubiquinol-cytochrome C reductase complex 14kD subunit. The ubiquinol-cytochrome C reductase complex (cytochrome bc1 complex) is a respiratory multienzyme complex. This Pfam family represents the 14kD (or VI) subunit of the complex which is not directly involved in electron transfer, but has a role in assembly of the complex.
Bgt-2279	1.08e-27	96.8688	UCR_hinge	cl03535	Cytochrome	Ubiquinol-cytochrome C reductase hinge protein. The ubiquinol-cytochrome C reductase complex (cytochrome bc1 complex) is a respiratory multienzyme complex. This Pfam family represents the 'hinge' protein of the complex which is thought to mediate formation of the cytochrome c1 and cytochrome c complex.
Bgt-183	8.06e-10	53.0405	UCR_TM	cl03782	Cytochrome	Ubiquinol cytochrome reductase transmembrane region. Each subunit of the cytochrome bc1 complex provides a single helix (this family) to make up the transmembrane region of the complex.
Bgt-1673	3.11e-40	127.641	UcrQ	cl03789	Cytochrome	UcrQ family. The ubiquinol-cytochrome C reductase complex (cytochrome bc1 complex) is a respiratory multienzyme complex. This family represents the 9.5 kDa subunit of the complex.
Bgt-1611					Effector
Bgt-20375					Effector
Bgt-20382					Effector
Bgt-20383					Effector
Bgt-2775					Effector
Bgt-2778					Effector
Bgt-2905					Effector
Bgt-721					Effector
BgtAcSP-31098					Effector
BgtAcSP-31175					Effector
BgtAcSP-31262					Effector
BgtASP-20145					Effector
Bgt_avrF2_1					Effector
Bgt_avrF2_10					Effector
Bgt_avrF2_11					Effector
Bgt_avrF2_22					Effector
Bgt_avrF2_24					Effector
Bgt_avrF2_3					Effector
Bgt_avrF2_7					Effector
Bgt_avrF2_9					Effector
Bgt_BCG-1					Effector
Bgt_BCG-5					Effector
Bgt_BCG-6					Effector
Bgt_BCG-9					Effector
BgtE-10001					Effector
BgtE-10002					Effector
BgtE-10100					Effector
BgtE-10116					Effector
BgtE-10117					Effector
BgtE-10121					Effector
BgtE-10122					Effector
BgtE-10124					Effector
BgtE-10129					Effector
BgtE-10137					Effector
BgtE-20000					Effector
BgtE-20001					Effector
BgtE-20002					Effector
BgtE-20004					Effector
BgtE-20005					Effector
BgtE-20008					Effector
BgtE-20009					Effector
BgtE-20010					Effector
BgtE-20014					Effector
BgtE-20017					Effector
BgtE-20019					Effector
BgtE-20020					Effector
BgtE-20022					Effector
BgtE-20025					Effector
BgtE-20026					Effector
BgtE-20027					Effector
BgtE-20031					Effector
BgtE-20032					Effector
BgtE-20033					Effector
BgtE-20034					Effector
BgtE-20039					Effector
BgtE-20040					Effector
BgtE-20041					Effector
BgtE-20048					Effector
BgtE-20049					Effector
BgtE-20052					Effector
BgtE-20054					Effector
BgtE-20055					Effector
BgtE-20057					Effector
BgtE-20060					Effector
BgtE-20062					Effector
BgtE-20063					Effector
BgtE-20064					Effector
BgtE-20067					Effector
BgtE-20068					Effector
BgtE-20069					Effector
BgtE-20073					Effector
BgtE-20074					Effector
BgtE-20075					Effector
BgtE-20079					Effector
BgtE-20090					Effector
BgtE-20100					Effector
BgtE-20101					Effector
BgtE-20103					Effector
BgtE-20106					Effector
BgtE-20114					Effector
BgtE-20119					Effector
BgtE-20120					Effector
BgtE-40011					Effector
BgtE-5550					Effector
BgtE-5560					Effector
BgtE-5686					Effector
BgtE-5690					Effector
BgtE-5709					Effector
BgtE-5710					Effector
BgtE-5816					Effector
BgtE-5818					Effector
BgtE-5820					Effector
BgtE-5826					Effector
BgtE-5829					Effector
BgtE-5845					Effector
BgtE-5861					Effector
BgtE-5867					Effector
BgtE-5880					Effector
BgtE-5883					Effector
BgtE-5889					Effector
BgtE-5891					Effector
BgtE-5912					Effector
BgtE-5921					Effector
BgtE-5922					Effector
BgtE-5923					Effector
BgtE-5929					Effector
BgtE-5973					Effector
BgtE-5981					Effector
BgtE-5985					Effector
BgtE-5991					Effector
BgtE-6034					Effector
BgtE-6054					Effector
Bgt-4574	1.24e-62	198.633	ELO	cl03120	fatty acid metabolism	GNS1/SUR4 family. Members of this family are involved in long chain fatty acid elongation systems that produce the 26-carbon precursors for ceramide and sphingolipid synthesis. Predicted to be integral membrane proteins, in eukaryotes they are probably located on the endoplasmic reticulum. Yeast ELO3 affects plasma membrane H+-ATPase activity, and may act on a glucose-signaling pathway that contr…
Bgt-970	4.86e-72	223.671	ELO	cl03120	fatty acid metabolism	GNS1/SUR4 family. Members of this family are involved in long chain fatty acid elongation systems that produce the 26-carbon precursors for ceramide and sphingolipid synthesis. Predicted to be integral membrane proteins, in eukaryotes they are probably located on the endoplasmic reticulum. Yeast ELO3 affects plasma membrane H+-ATPase activity, and may act on a glucose-signaling pathway that contr…
Bgt-1453-2	1.24e-37	132.205	DEXDc superfamily	cl26939	helicase	DEAD-like helicases superfamily
Bgt-2333	0	621.076	DEXDc superfamily	cl26939	helicase	DEAD-like helicases superfamily
Bgt-2783	1.07e-139	409.565	SrmB	cl26939	helicase	DEAD-like helicases superfamily
Bgt-3234	1.69e-44	139.104	PTZ00015	cl25876	Histone	histone H4; Provisional
Bgt-741	3.01e-44	138.333	PTZ00015	cl25876	Histone	histone H4; Provisional
Bgt-2772	8.69e-25	92.1767	Linker_histone	cl00073	Histone	linker histone 1 and histone 5 domains; the basic subunit of chromatin is the nucleosome, consisting of an octamer of core histones, two full turns of DNA, a linker histone (H1 or H5) and a variable length of linker DNA; H1/H5 are chromatin-associated proteins that bind to the exterior of nucleosomes and dramatically stabilize the highly condensed states of chromatin fibers; stabilization of high…
BgtA-20112	5.17e-49	151.901	H2B	cl23830	Histone	Core histone H2A/H2B/H3/H4
Bgt-1987	7.53e-69	203.438	PTZ00017	cl25693	Histone	Histone 2A; H2A is a subunit of the nucleosome. The nucleosome is an octamer containing two H2A, H2B, H3, and H4 subunits. The H2A subunit performs essential roles in maintaining structural integrity of the nucleosome, chromatin condensation, and binding of specific chromatin-associated proteins.
Bgt-2715	2.39e-102	301.391	NAP	cl08298	Histone	Nucleosome assembly protein (NAP). NAP proteins are involved in moving histones into the nucleus, nucleosome assembly and chromatin fluidity. They affect the transcription of many genes.
BgtAc-31294	0.00243428	33.7741	CHZ	cl09864	Histone	Histone chaperone domain CHZ. This domain is highly conserved from yeasts to humans and is part of the chaperone protein HIRIP3 in vertebrates which interacts with the H3.3 chaperone HIRA, implicated in histone replacement during transcription. N- and C- termini of Chz family members are relatively divergent but do contain similar acidic stretches rich in Glu/Asp residues, characteristic of all h…
Bgt-688	8.1e-15	62.2381	HMA	cl00207	HMA	Heavy-metal-associated domain (HMA) is a conserved domain of approximately 30 amino acid residues found in a number of proteins that transport or detoxify heavy metals, for example, the CPx-type heavy metal ATPases and copper chaperones. HMA domain contains two cysteine residues that are important in binding and transfer of metal ions, such as copper, cadmium, cobalt and zinc. In the case of copp…
Bgt-931	4.03e-138	386.501	2014-03-03	cl02098	HSP	14-3-3 domain is an essential part of 14-3-3 proteins, a ubiquitous class of regulatory, phosphoserine/threonine-binding proteins found in all eukaryotic cells, including yeast, protozoa and mammalian cells. 14-3-3 proteins play important roles in many biological processes that are regulated by phosphorylation, including cell cycle regulation, cell proliferation, protein trafficking, metabolic re…
Bgt-929	1.74e-159	442.128	14-3-3 superfamily	cl02098	HSP	14-3-3 domain is an essential part of 14-3-3 proteins, a ubiquitous class of regulatory, phosphoserine/threonine-binding proteins found in all eukaryotic cells, including yeast, protozoa and mammalian cells. 14-3-3 proteins play important roles in many biological processes that are regulated by phosphorylation, including cell cycle regulation, cell proliferation, protein trafficking, metabolic re…
Bgt-2697	4.7e-15	67.194	ACD_sHsps-like	cl00175	HSP	The alpha-crystallin-Hsps_p23-like superfamily includes the alpha-crystallin domain (ACD) of alpha-crystallin-type small heat shock proteins (sHsps) and a similar domain found in p23-like proteins. sHsps are small stress induced proteins with monomeric masses between 12-43 kDa, whose common feature is this ACD. sHsps are generally active as large oligomers consisting of multiple subunits, and are…
Bgt-573	1.98e-18	75.6684	ACD_sHsps-like	cl00175	HSP	The alpha-crystallin-Hsps_p23-like superfamily includes the alpha-crystallin domain (ACD) of alpha-crystallin-type small heat shock proteins (sHsps) and a similar domain found in p23-like proteins. sHsps are small stress induced proteins with monomeric masses between 12-43 kDa, whose common feature is this ACD. sHsps are generally active as large oligomers consisting of multiple subunits, and are…
Bgt-5439	1.75e-26	96.0773	p23_NUDC_like	cl00175	HSP	The alpha-crystallin-Hsps_p23-like superfamily includes the alpha-crystallin domain (ACD) of alpha-crystallin-type small heat shock proteins (sHsps) and a similar domain found in p23-like proteins. sHsps are small stress induced proteins with monomeric masses between 12-43 kDa, whose common feature is this ACD. sHsps are generally active as large oligomers consisting of multiple subunits, and are…
Bgt-983	1.29e-103	321.204	Abhydrolase superfamily	cl21494	Hydrolase	alpha/beta hydrolases. A functionally diverse superfamily containing proteases, lipases, peroxidases, esterases, epoxide hydrolases and dehalogenases. The catalytic apparatus typically involves three residues (catalytic triad): a serine, a glutamate or aspartate and a histidine, and often the mechanism involves a nucleophilic attack on a carbonyl carbon atom.
Bgt-2156	8.33e-94	271.053	cyclophilin superfamily	cl00197	isomerase	cyclophilin: cyclophilin-type peptidylprolyl cis- trans isomerases. This family contains eukaryotic, bacterial and archeal proteins which exhibit a peptidylprolyl cis- trans isomerases activity (PPIase, Rotamase) and in addition bind the immunosuppressive drug cyclosporin (CsA). Immunosuppression in vertebrates is believed to be the result of the cyclophilin A-cyclosporin protein drug complex bin…
Bgt-2373	9.06e-97	281.453	cyclophilin superfamily	cl00197	isomerase	cyclophilin: cyclophilin-type peptidylprolyl cis- trans isomerases. This family contains eukaryotic, bacterial and archeal proteins which exhibit a peptidylprolyl cis- trans isomerases activity (PPIase, Rotamase) and in addition bind the immunosuppressive drug cyclosporin (CsA). Immunosuppression in vertebrates is believed to be the result of the cyclophilin A-cyclosporin protein drug complex bin…
Bgt-4906	2.29e-108	314.195	cyclophilin_ABH_like	cl00197	isomerase	cyclophilin: cyclophilin-type peptidylprolyl cis- trans isomerases. This family contains eukaryotic, bacterial and archeal proteins which exhibit a peptidylprolyl cis- trans isomerases activity (PPIase, Rotamase) and in addition bind the immunosuppressive drug cyclosporin (CsA). Immunosuppression in vertebrates is believed to be the result of the cyclophilin A-cyclosporin protein drug complex bin…
Bgt-4035	8.13e-37	123.679	FKBP_N superfamily	cl27578	Isomerase	Domain amino terminal to FKBP-type peptidyl-prolyl isomerase. This family is only found at the amino terminus of pfam00254. This domain is of unknown function.
Bgt-4181	2.46e-42	149.102	FkpA	cl27578	Isomerase	Domain amino terminal to FKBP-type peptidyl-prolyl isomerase. This family is only found at the amino terminus of pfam00254. This domain is of unknown function.
Bgt-3159	1.53e-17	84.013	MFS_1	cl26865	MFS	Major Facilitator Superfamily
Bgt-20113	6.3e-17	74.6151	Mito_carr	cl28162	Mitochondrion	Mitochondrial carrier protein
Bgt-20113	6.42e-16	71.9187	Mito_carr	cl28162	Mitochondrion	Mitochondrial carrier protein
Bgt-1136	2.49e-08	50.7327	Mito_carr superfamily	cl28162	Mitochondrion	Mitochondrial carrier protein
Bgt-1136	0.000434889	38.7915	Mito_carr superfamily	cl28162	Mitochondrion	Mitochondrial carrier protein
Bgt-1136	0.00129706	37.2507	Mito_carr superfamily	cl28162	Mitochondrion	Mitochondrial carrier protein
Bgt-20113	2.21e-08	50.7327	Mito_carr superfamily	cl28162	Mitochondrion	Mitochondrial carrier protein
Bgt-366	1.99e-114	332.118	Mito_carr superfamily	cl28162	Mitochondrion	Mitochondrial carrier protein
Bgt-275	4.24e-70	215.535	Porin3_VDAC	cl03224	Mitochondrion	Eukaryotic porin family that forms channels in the mitochondrial outer membrane. The porin family 3 contains two sub-families that play vital roles in the mitochondrial outer membrane, a translocase for unfolded pre-proteins (Tom40) and the voltage-dependent anion channel (VDAC) that regulates the flux of mostly anionic metabolites through the outer mitochondrial membrane.
Bgt-4059	8.21e-19	74.1159	IATP superfamily	cl04596	Mitochondrion	Mitochondrial ATPase inhibitor, IATP. ATP synthase inhibitor prevents the enzyme from switching to ATP hydrolysis during collapse of the electrochemical gradient, for example during oxygen deprivation ATP synthase inhibitor forms a one to one complex with the F1 ATPase, possibly by binding at the alpha-beta interface. It is thought to inhibit ATP synthesis by preventing the release of ATP. The mi…
Bgt-479	7.57e-20	73.7355	ATP-synt_Eps	cl04635	Mitochondrion	eukaryotic mitochondrial ATP synthase epsilon subunit. The F-ATPase is found in bacterial plasma membranes, mitochondrial inner membranes, and in chloroplast thylakoid membranes. It uses a proton gradient to drive ATP synthesis and hydrolyzes ATP to build the proton gradient. The extrinsic membrane domain, F1, is composed of alpha, beta, gamma, delta, and epsilon subunits (only found in eukaryote…
Bgt-3885	1.1e-12	54.911	Tom5	cl11251	Mitochondrion	Mitochondrial import receptor subunit or translocase. This protein family is very short and is only found in yeasts. Tom5 is one of three very small translocases of the mitochondrial outer membrane. Tom5 links mitochondrial preprotein receptors to the general import pore. Although Tom5 has allegedly been identified in vertebrates this could not be confirmed.
Bgt-3193	0	865.231	AdoHcyase	cl21454	NADP	Rossmann-fold NAD(P)(+)-binding proteins. A large family of proteins that share a Rossmann-fold NAD(P)H/NAD(P)(+) binding (NADB) domain. The NADB domain is found in numerous dehydrogenases of metabolic pathways such as glycolysis, and many other redox enzymes. NAD binding involves numerous hydrogen-bonds and van der Waals contacts, in particular H-bonding of residues in a turn between the first s…
Bgt-724	0	526.672	MDH_glyoxysomal_mitochondrial	cl21454	NADP	Rossmann-fold NAD(P)(+)-binding proteins. A large family of proteins that share a Rossmann-fold NAD(P)H/NAD(P)(+) binding (NADB) domain. The NADB domain is found in numerous dehydrogenases of metabolic pathways such as glycolysis, and many other redox enzymes. NAD binding involves numerous hydrogen-bonds and van der Waals contacts, in particular H-bonding of residues in a turn between the first s…
Bgt-725	2.46e-176	490.463	MDH_glyoxysomal_mitochondrial	cl21454	NADP	Rossmann-fold NAD(P)(+)-binding proteins. A large family of proteins that share a Rossmann-fold NAD(P)H/NAD(P)(+) binding (NADB) domain. The NADB domain is found in numerous dehydrogenases of metabolic pathways such as glycolysis, and many other redox enzymes. NAD binding involves numerous hydrogen-bonds and van der Waals contacts, in particular H-bonding of residues in a turn between the first s…
BgtA-20909	1.68e-109	319.201	ARA1	cl00470	NADP	Aldo-keto reductases (AKRs) are a superfamily of soluble NAD(P)(H) oxidoreductases whose chief purpose is to reduce aldehydes and ketones to primary and secondary alcohols. AKRs are present in all phyla and are of importance to both health and industrial applications. Members have very distinct functions and include the prokaryotic 2,5-diketo-D-gluconic acid reductases and beta-keto ester reducta…
Bgt-5366	1.56e-129	367.042	MDH-like_SDR_c	cl25409	Oxidoreductase	Short-chain dehydrogenases/reductases (SDR). SDRs are a functionally diverse family of oxidoreductases that have a single domain with a structurally conserved Rossmann fold (alpha/beta folding pattern with a central beta-sheet), an NAD(P)(H)-binding region, and a structurally diverse C-terminal region. Classical SDRs are typically about 250 residues long, while extended SDRs are approximately 350…
Bgt-1675	4.29e-63	205.224	SDR superfamily	cl25409	Oxidoreductase	Short-chain dehydrogenases/reductases (SDR). SDRs are a functionally diverse family of oxidoreductases that have a single domain with a structurally conserved Rossmann fold (alpha/beta folding pattern with a central beta-sheet), an NAD(P)(H)-binding region, and a structurally diverse C-terminal region. Classical SDRs are typically about 250 residues long, while extended SDRs are approximately 350…
Bgt-128	1.73e-37	120.722	GRX_GRXh_1_2_like	cl00388	Oxidoreductase	Protein Disulfide Oxidoreductases and Other Proteins with a Thioredoxin fold, The thioredoxin (TRX)-like superfamily is a large, diverse group of proteins containing a TRX fold. Many members contain a classic TRX domain with a redox active CXXC motif. They function as protein disulfide oxidoreductases (PDOs), altering the redox state of target proteins via the reversible oxidation of their active…
BgtA-21169	4.28e-24	94.6283	GST_N_EF1Bgamma	cl00388	Oxidoreductase	Protein Disulfide Oxidoreductases and Other Proteins with a Thioredoxin fold, The thioredoxin (TRX)-like superfamily is a large, diverse group of proteins containing a TRX fold. Many members contain a classic TRX domain with a redox active CXXC motif. They function as protein disulfide oxidoreductases (PDOs), altering the redox state of target proteins via the reversible oxidation of their active…
Bgt-5050	5.69e-49	160.149	Phd_like_Phd	cl00388	Oxidoreductase	Protein Disulfide Oxidoreductases and Other Proteins with a Thioredoxin fold, The thioredoxin (TRX)-like superfamily is a large, diverse group of proteins containing a TRX fold. Many members contain a classic TRX domain with a redox active CXXC motif. They function as protein disulfide oxidoreductases (PDOs), altering the redox state of target proteins via the reversible oxidation of their active…
Bgt-1315	7.6e-62	187.384	PRX5_like	cl00388	Oxidoreductase	Protein Disulfide Oxidoreductases and Other Proteins with a Thioredoxin fold, The thioredoxin (TRX)-like superfamily is a large, diverse group of proteins containing a TRX fold. Many members contain a classic TRX domain with a redox active CXXC motif. They function as protein disulfide oxidoreductases (PDOs), altering the redox state of target proteins via the reversible oxidation of their active…
Bgt-2090	5.17e-32	107.644	TRX_family	cl00388	Oxidoreductase	Protein Disulfide Oxidoreductases and Other Proteins with a Thioredoxin fold, The thioredoxin (TRX)-like superfamily is a large, diverse group of proteins containing a TRX fold. Many members contain a classic TRX domain with a redox active CXXC motif. They function as protein disulfide oxidoreductases (PDOs), altering the redox state of target proteins via the reversible oxidation of their active…
Bgt-1014	1.9e-132	387.571	Peptidase_S10 superfamily	cl08270	Peptidase	Serine carboxypeptidase
BgtASP-20303	0.006934	36.0639	Peptidase_S10 superfamily	cl08270	Peptidase	Serine carboxypeptidase
Bgt-2722	9.04e-22	97.1452	PqqL	cl25707	Peptidase	Peptidase M16 inactive domain. Peptidase M16 consists of two structurally related domains. One is the active peptidase, whereas the other is inactive. The two domains hold the substrate like a clamp.
Bgt-31	5.22e-139	401.124	Peptidases_S8_PCSK9_ProteinaseK_like	cl10459	Peptidase	Peptidase domain in the S8 and S53 families. Members of the peptidases S8 (subtilisin and kexin) and S53 (sedolisin) family include endopeptidases and exopeptidases. The S8 family has an Asp/His/Ser catalytic triad similar to that found in trypsin-like proteases, but do not share their three-dimensional structure and are not homologous to trypsin. Serine acts as a nucleophile, aspartate as an ele…
Bgt-3988	5.56e-08	44.9637	Inhibitor_I78 superfamily	cl18597	Peptidase inhibitor	Peptidase inhibitor I78 family. This family includes Aspergillus elastase inhibitor and belongs to MEROPS peptidase inhibitor family I78.
Bgt-31	1.53e-17	76.95	Inhibitor_I9	cl05470	Peptidase inhibitor	Peptidase inhibitor I9. This family includes the proteinase B inhibitor from Saccharomyces cerevisiae and the activation peptides from peptidases of the subtilisin family. The subtilisin propeptides are known to function as molecular chaperones, assisting in the folding of the mature peptidase, but have also been shown to act as 'temporary inhibitors'.
Bgt-1202	7.04e-151	425.079	ascorbate_peroxidase	cl00196	Peroxidase	Along with animal peroxidases, these enzymes belong to a group of peroxidases containing a heme prosthetic group (ferriprotoporphyrin IX), which catalyzes a multistep oxidative reaction involving hydrogen peroxide as the electron acceptor. The plant peroxidase-like superfamily is found in all three kingdoms of life and carries out a variety of biosynthetic and degradative functions. Several sub-f…
Bgt-1329	5.2e-53	162.716	Profilin	cl00123	Phospholipids	Profilin binds actin monomers, membrane polyphosphoinositides such as PI(4,5)P2, and poly-L-proline. Profilin can inhibit actin polymerization into F-actin by binding to monomeric actin (G-actin) and terminal F-actin subunits, but - as a regulator of the cytoskeleton - it may also promote actin polymerization. It plays a role in the assembly of branched actin filament networks, by activating WASP…
Bgt-4412	3.41e-10	57.0619	PEMT superfamily	cl21511	Phospholopid metabolism	Phospholipid methyltransferase. The S. cerevisiae phospholipid methyltransferase (EC:2.1.1.16) has a broad substrate specificity of unsaturated phospholipids.
BgtA-21550	7.52e-42	144.809	PEMT superfamily	cl21511	Phospholopid metabolism	Phospholipid methyltransferase. The S. cerevisiae phospholipid methyltransferase (EC:2.1.1.16) has a broad substrate specificity of unsaturated phospholipids.
Bgt-4378	4.16e-134	372.377	P-loop_NTPase superfamily	cl21455	P-loop_NTPase	P-loop containing Nucleoside Triphosphate Hydrolases. Members of the P-loop NTPase domain superfamily are characterized by a conserved nucleotide phosphate-binding motif, also referred to as the Walker A motif (GxxxxGK[S/T], where x is any residue), and the Walker B motif (hhhh[D/E], where h is a hydrophobic residue). The Walker A and B motifs bind the beta-gamma phosphate moiety of the bound nuc…
Bgt-2308	2.36e-129	360.106	Rab1_Ypt1	cl21455	P-loop_NTPase	P-loop containing Nucleoside Triphosphate Hydrolases. Members of the P-loop NTPase domain superfamily are characterized by a conserved nucleotide phosphate-binding motif, also referred to as the Walker A motif (GxxxxGK[S/T], where x is any residue), and the Walker B motif (hhhh[D/E], where h is a hydrophobic residue). The Walker A and B motifs bind the beta-gamma phosphate moiety of the bound nuc…
Bgt-2731	1.79e-128	358.026	Rab11_like	cl21455	P-loop_NTPase	P-loop containing Nucleoside Triphosphate Hydrolases. Members of the P-loop NTPase domain superfamily are characterized by a conserved nucleotide phosphate-binding motif, also referred to as the Walker A motif (GxxxxGK[S/T], where x is any residue), and the Walker B motif (hhhh[D/E], where h is a hydrophobic residue). The Walker A and B motifs bind the beta-gamma phosphate moiety of the bound nuc…
Bgt-3569	3.72e-126	352.116	RhoA_like	cl21455	P-loop_NTPase	P-loop containing Nucleoside Triphosphate Hydrolases. Members of the P-loop NTPase domain superfamily are characterized by a conserved nucleotide phosphate-binding motif, also referred to as the Walker A motif (GxxxxGK[S/T], where x is any residue), and the Walker B motif (hhhh[D/E], where h is a hydrophobic residue). The Walker A and B motifs bind the beta-gamma phosphate moiety of the bound nuc…
Bgt-1946	2.44e-120	338.098	Sar1	cl21455	P-loop_NTPase	P-loop containing Nucleoside Triphosphate Hydrolases. Members of the P-loop NTPase domain superfamily are characterized by a conserved nucleotide phosphate-binding motif, also referred to as the Walker A motif (GxxxxGK[S/T], where x is any residue), and the Walker B motif (hhhh[D/E], where h is a hydrophobic residue). The Walker A and B motifs bind the beta-gamma phosphate moiety of the bound nuc…
Bgt-4991	2.91e-33	123.25	MPP_PPP_family	cl13995	Protease	metallophosphatase superfamily, metallophosphatase domain. Metallophosphatases (MPPs), also known as metallophosphoesterases, phosphodiesterases (PDEs), binuclear metallophosphoesterases, and dimetal-containing phosphoesterases (DMPs), represent a diverse superfamily of enzymes with a conserved domain containing an active site consisting of two metal ions (usually manganese, iron, or zinc) coordi…
Bgt-3374	1.04e-66	221.404	MPP_superfamily superfamily	cl13995	Protease	metallophosphatase superfamily, metallophosphatase domain. Metallophosphatases (MPPs), also known as metallophosphoesterases, phosphodiesterases (PDEs), binuclear metallophosphoesterases, and dimetal-containing phosphoesterases (DMPs), represent a diverse superfamily of enzymes with a conserved domain containing an active site consisting of two metal ions (usually manganese, iron, or zinc) coordi…
Bgt-5489	1.73e-18	71.4648	DSS1_SEM1	cl04961	Proteasome	proteasome complex subunit DSS1/Sem1. The evolutionarily conserved deleted in split hand/split foot protein 1 (DSS1)/Sem1 is a subunit of the regulatory particle (RP) of the proteasome. It is implicated in ubiquitin-mediated proteolysis, is required for the maintenance of genomic stability, and functions in DNA damage response. DSS1/Sem1 also displays RP-independent functions; it serves as a func…
Bgt-305	1.69e-20	79.4418	KOW_RPL14	cl00354	Ribosome/Translation	KOW domain is known as an RNA-binding motif that is shared so far among some families of ribosomal proteins, the essential bacterial transcriptional elongation factor NusG, the eukaryotic chromatin elongation factor Spt5, the higher eukaryotic KIN17 proteins and Mtr4. The KOW motif contains an invariants glycine residue and comprises alternating blocks of hydrophilic and hydrophobic residues.
Bgt-1700	7.79e-72	214.719	KOW_RPL6	cl00354	Ribosome/Translation	KOW domain is known as an RNA-binding motif that is shared so far among some families of ribosomal proteins, the essential bacterial transcriptional elongation factor NusG, the eukaryotic chromatin elongation factor Spt5, the higher eukaryotic KIN17 proteins and Mtr4. The KOW motif contains an invariants glycine residue and comprises alternating blocks of hydrophilic and hydrophobic residues.
BgtA-20452	3.26e-59	178.435	Ribosomal_L26	cl00354	Ribosome/Translation	KOW domain is known as an RNA-binding motif that is shared so far among some families of ribosomal proteins, the essential bacterial transcriptional elongation factor NusG, the eukaryotic chromatin elongation factor Spt5, the higher eukaryotic KIN17 proteins and Mtr4. The KOW motif contains an invariants glycine residue and comprises alternating blocks of hydrophilic and hydrophobic residues.
Bgt-3978	1.35e-35	117.608	PTZ00157	cl00706	Ribosome/Translation	Ribosomal protein L44
Bgt-2471	6.16e-28	96.0597	Ribosomal_L44	cl00706	Ribosome/Translation	Ribosomal protein L44
Bgt-2018	4.27e-62	184.125	PTZ00106	cl00600	Ribosome/Translation	Ribosomal protein L7Ae/L30e/S12e/Gadd45 family. This family includes: Ribosomal L7A from metazoa, Ribosomal L8-A and L8-B from fungi, 30S ribosomal protein HS6 from archaebacteria, 40S ribosomal protein S12 from eukaryotes, Ribosomal protein L30 from eukaryotes and archaebacteria. Gadd45 and MyD118.
Bgt-3741	2.11e-33	112.721	Ribosomal_L7Ae	cl00600	Ribosome/Translation	Ribosomal protein L7Ae/L30e/S12e/Gadd45 family. This family includes: Ribosomal L7A from metazoa, Ribosomal L8-A and L8-B from fungi, 30S ribosomal protein HS6 from archaebacteria, 40S ribosomal protein S12 from eukaryotes, Ribosomal protein L30 from eukaryotes and archaebacteria. Gadd45 and MyD118.
Bgt-2236	1.66e-27	97.7728	Rpl7Ae	cl00600	Ribosome/Translation	Ribosomal protein L7Ae/L30e/S12e/Gadd45 family. This family includes: Ribosomal L7A from metazoa, Ribosomal L8-A and L8-B from fungi, 30S ribosomal protein HS6 from archaebacteria, 40S ribosomal protein S12 from eukaryotes, Ribosomal protein L30 from eukaryotes and archaebacteria. Gadd45 and MyD118.
Bgt-3833	4.42e-24	87.7623	Ribosomal_P1	cl21508	Ribosome/Translation	Ribosomal protein P1, P2, and L12p. Ribosomal proteins P1 and P2 are the eukaryotic proteins that are functionally equivalent to bacterial L7/L12. L12p is the archaeal homolog. Unlike other ribosomal proteins, the archaeal L12p and eukaryotic P1 and P2 do not share sequence similarity with their bacterial counterparts. They are part of the ribosomal stalk (called the L7/L12 stalk in bacteria), al…
Bgt-2623	2.38e-35	116.594	Ribosomal_P2	cl21508	Ribosome/Translation	Ribosomal protein P1, P2, and L12p. Ribosomal proteins P1 and P2 are the eukaryotic proteins that are functionally equivalent to bacterial L7/L12. L12p is the archaeal homolog. Unlike other ribosomal proteins, the archaeal L12p and eukaryotic P1 and P2 do not share sequence similarity with their bacterial counterparts. They are part of the ribosomal stalk (called the L7/L12 stalk in bacteria), al…
Bgt-5166	7.18e-32	105.814	Ribosomal_S12_like superfamily	cl00312	Ribosome/Translation	Ribosomal protein S12-like family; composed of prokaryotic 30S ribosomal protein S12, eukaryotic 40S ribosomal protein S23 and similar proteins. S12 and S23 are located at the interface of the large and small ribosomal subunits, adjacent to the decoding center. They play an important role in translocation during the peptide elongation step of protein synthesis. They are also involved in important…
Bgt-5461	1.61e-43	137.182	Ribosomal_S12_like superfamily	cl00312	Ribosome/Translation	Ribosomal protein S12-like family; composed of prokaryotic 30S ribosomal protein S12, eukaryotic 40S ribosomal protein S23 and similar proteins. S12 and S23 are located at the interface of the large and small ribosomal subunits, adjacent to the decoding center. They play an important role in translocation during the peptide elongation step of protein synthesis. They are also involved in important…
Bgt-5462	1.61e-43	137.182	Ribosomal_S12_like superfamily	cl00312	Ribosome/Translation	Ribosomal protein S12-like family; composed of prokaryotic 30S ribosomal protein S12, eukaryotic 40S ribosomal protein S23 and similar proteins. S12 and S23 are located at the interface of the large and small ribosomal subunits, adjacent to the decoding center. They play an important role in translocation during the peptide elongation step of protein synthesis. They are also involved in important…
Bgt-3321	3.08e-11	62.657	RRM	cl25887	Ribosome/Translation	RNA recognition motif (RRM) domain [Translation, ribosomal structure and biogenesis]
Bgt-3360	7.9e-10	59.1902	RRM	cl25887	Ribosome/Translation	RNA recognition motif (RRM) domain [Translation, ribosomal structure and biogenesis]
Bgt-2009	0	672.288	RRM superfamily	cl25887	Ribosome/Translation	RNA recognition motif (RRM) domain [Translation, ribosomal structure and biogenesis]
Bgt-2447	3.27e-21	92.9477	RRM superfamily	cl25887	Ribosome/Translation	RNA recognition motif (RRM) domain [Translation, ribosomal structure and biogenesis]
BgtA-21440	8.64e-79	230.082	PTZ00329	cl09927	Ribosome/Translation	S1_like: Ribosomal protein S1-like RNA-binding domain. Found in a wide variety of RNA-associated proteins. Originally identified in S1 ribosomal protein. This superfamily also contains the Cold Shock Domain (CSD), which is a homolog of the S1 domain. Both domains are members of the Oligonucleotide/oligosaccharide Binding (OB) fold.
Bgt-4913	7.74e-43	136.789	S1_Hex1	cl09927	Ribosome/Translation	S1_like: Ribosomal protein S1-like RNA-binding domain. Found in a wide variety of RNA-associated proteins. Originally identified in S1 ribosomal protein. This superfamily also contains the Cold Shock Domain (CSD), which is a homolog of the S1 domain. Both domains are members of the Oligonucleotide/oligosaccharide Binding (OB) fold.
Bgt-3719	2.32e-28	95.3947	S1_S28E	cl09927	Ribosome/Translation	S1_like: Ribosomal protein S1-like RNA-binding domain. Found in a wide variety of RNA-associated proteins. Originally identified in S1 ribosomal protein. This superfamily also contains the Cold Shock Domain (CSD), which is a homolog of the S1 domain. Both domains are members of the Oligonucleotide/oligosaccharide Binding (OB) fold.
Bgt-3117	2.37e-138	390.574	PTZ00254	cl00315	Ribosome/Translation	Ribosomal protein S2 (RPS2), involved in formation of the translation initiation complex, where it might contact the messenger RNA and several components of the ribosome. It has been shown that in Escherichia coli RPS2 is essential for the binding of ribosomal protein S1 to the 30s ribosomal subunit. In humans, most likely in all vertebrates, and perhaps in all metazoans, the protein also functio…
Bgt-1926	2.55e-115	327.466	Ribosomal_L1 superfamily	cl00322	Ribosome/Translation	Ribosomal protein L1. The L1 protein, located near the E-site of the ribosome, forms part of the L1 stalk along with 23S rRNA. In bacteria and archaea, L1 functions both as a ribosomal protein that binds rRNA, and as a translation repressor that binds its own mRNA. Like several other large ribosomal subunit proteins, L1 displays RNA chaperone activity. L1 is one of the largest ribosomal proteins.…
Bgt-4497	0	674.111	PTZ00103	cl00324	Ribosome/Translation	Ribosomal protein L3
Bgt-4608	2.26e-63	193.362	Ribosomal_L22 superfamily	cl00327	Ribosome/Translation	Ribosomal protein L22/L17e. L22 (L17 in eukaryotes) is a core protein of the large ribosomal subunit. It is the only ribosomal protein that interacts with all six domains of 23S rRNA, and is one of the proteins important for directing the proper folding and stabilizing the conformation of 23S rRNA. L22 is the largest protein contributor to the surface of the polypeptide exit channel, the tunnel t…
Bgt-2057	3.56e-82	237.315	PTZ00054	cl00328	Ribosome/Translation	Ribosomal protein L14p/L23e
Bgt-3743	1.5e-86	247.71	PTZ00158	cl00330	Ribosome/Translation	Ribosomal protein S8
Bgt-5219	8.24e-79	228.76	PTZ00134	cl00331	Ribosome/Translation	This family includes ribosomal protein S13 from prokaryotes and S18 from eukaryotes.
Bgt-1454	7.45e-83	240.148	PTZ00129	cl00332	Ribosome/Translation	Ribosomal protein S11
Bgt-2241	2.64e-98	283.096	PTZ00068	cl00333	Ribosome/Translation	Ribosomal protein L13. Protein L13, a large ribosomal subunit protein, is one of five proteins required for an early folding intermediate of 23S rRNA in the assembly of the large subunit. L13 is situated on the bottom of the large subunit, near the polypeptide exit site. It interacts with proteins L3 and L6, and forms an extensive network of interactions with 23S rRNA. L13 has been identified as …
Bgt-1455	1.48e-89	256.541	PTZ00086	cl00334	Ribosome/Translation	This family includes small ribosomal subunit S9 from prokaryotes and S16 from eukaryotes.
Bgt-2631	1.24e-85	246.86	PTZ00096	cl00350	Ribosome/Translation	Ribosomal protein S19
Bgt-3018	2.01e-33	111.471	bS6_mito	cl00414	Ribosome/Translation	Bacterial ribosomal protein S6. bS6 is one of the components of the small subunit of the prokaryotic ribosome, a ribonucleoprotein organelle that decodes the genetic information in messenger RNA and forms peptide bonds to synthesize the corresponding polypeptides. Ribosomes consist of a large and a small subunit, which assemble during the initiation stage of protein synthesis. Prokaryotic ribosom…
Bgt-2921	9.28e-76	220.579	Ribosomal_S17e	cl00610	Ribosome/Translation	Ribosomal S17
Bgt-1075	8.33e-66	195.605	PTZ00159	cl00748	Ribosome/Translation	Ribosomal_L32_L32e: L32 is a protein from the large subunit that contains a surface-exposed globular domain and a finger-like projection that extends into the RNA core to stabilize the tertiary structure. L32 does not appear to play a role in forming the A (aminacyl), P (peptidyl) or E (exit) sites of the ribosome, but does interact with 23S rRNA, which has a "kink-turn" secondary structure motif…
Bgt-145	6.4e-89	260.476	Ribosomal_S3Ae	cl00821	Ribosome/Translation	Ribosomal S3Ae family
Bgt-2407	2.63e-25	91.0892	Ribosomal_S27	cl00876	Ribosome/Translation	Ribosomal protein S27a. This family of ribosomal proteins consists mainly of the 40S ribosomal protein S27a which is synthesized as a C-terminal extension of ubiquitin (CEP). The S27a domain compromises the C-terminal half of the protein. The synthesis of ribosomal proteins as extensions of ubiquitin promotes their incorporation into nascent ribosomes by a transient metabolic stabilisation and is…
Bgt-2934	5.61e-48	150.565	PTZ00071	cl00878	Ribosome/Translation	Ribosomal protein S24e
Bgt-3408	4.16e-50	151.746	PTZ00083	cl00897	Ribosome/Translation	Ribosomal protein S27
Bgt-3612	4.48e-28	98.7503	Ribosomal_L24e	cl00909	Ribosome/Translation	Ribosomal protein L24e/L24 is a ribosomal protein found in eukaryotes (L24) and in archaea (L24e, distinct from archaeal L24). L24e/L24 is located on the surface of the large subunit, adjacent to proteins L14 and L3, and near the translation factor binding site. L24e/L24 appears to play a role in the kinetics of peptide synthesis, and may be involved in interactions between the large and small su…
Bgt-4194	3.06e-48	148.821	Ribosomal_L31e	cl00921	Ribosome/Translation	Eukaryotic/archaeal ribosomal protein L31. Ribosomal protein L31e, which is present in archaea and eukaryotes, binds the 23S rRNA and is one of six protein components encircling the polypeptide exit tunnel. It is a component of the eukaryotic 60S (large) ribosomal subunit, and the archaeal 50S (large) ribosomal subunit.
Bgt-2329	1.09e-90	265.135	Ribosomal_S6e superfamily	cl00931	Ribosome/Translation	Ribosomal protein S6e
Bgt-4558	2.91e-36	117.575	PTZ00073	cl00932	Ribosome/Translation	Ribosomal protein L37e. This family includes ribosomal protein L37 from eukaryotes and archaebacteria. The family contains many conserved cysteines and histidines suggesting that this protein may bind to zinc.
Bgt-3714	7.16e-68	202.919	PTZ00189	cl00937	Ribosome/Translation	Ribosomal protein L21e
Bgt-2839	4.93e-25	92.0498	RPL20A	cl00945	Ribosome/Translation	Ribosomal proteins 50S-L18Ae/60S-L20/60S-L18A. This family includes: archaeal 50S ribosomal protein L18Ae, often referred to as L20e or LX; fungal 60S ribosomal protein L20; and higher eukaryote 60S ribosomal protein L18A.
Bgt-1042	6.46e-40	126.086	Ribosomal_L34e	cl00955	Ribosome/Translation	Ribosomal protein L34e
Bgt-2148	2.91e-78	227.686	Ribosomal_S19e	cl00969	Ribosome/Translation	Ribosomal protein S19e
Bgt-3864	8.21e-100	286.728	Ribosomal_L13e	cl01799	Ribosome/Translation	Ribosomal protein L13e
Bgt-1712	7.21e-56	167.815	Ribosomal_S26e	cl01993	Ribosome/Translation	Ribosomal protein S26e
Bgt-3242	1.02e-27	96.1226	Ribosomal_S25	cl02050	Ribosome/Translation	S25 ribosomal protein
Bgt-476	1.05e-44	139.571	Ribosomal_L36e	cl02104	Ribosome/Translation	Ribosomal protein L36e
Bgt-3297	4.55e-106	302.498	Ribosomal_L15e	cl02977	Ribosome/Translation	Ribosomal L15
Bgt-3874	4.42e-56	166.899	Ribosomal_S21e	cl03140	Ribosome/Translation	Ribosomal protein S21e
Bgt-1498	4.67e-61	185.041	Ribosomal_S7e superfamily	cl03141	Ribosome/Translation	Ribosomal protein S7e
BgtA-20060	2.8e-57	172.692	Ribosomal_L22e	cl03348	Ribosome/Translation	Ribosomal L22e protein family
Bgt-2120	5.17e-36	119.497	Ribosomal_L28e	cl03350	Ribosome/Translation	Ribosomal L28e protein family
Bgt-3236	4.12e-30	100.672	Ribosomal_L38e	cl03352	Ribosome/Translation	Ribosomal L38e protein family
Bgt-3322	1.73e-19	72.958	RAMP4	cl05913	Ribosome/Translation	Ribosome associated membrane protein RAMP4. This family consists of several ribosome associated membrane protein RAMP4 (or SERP1) sequences. Stabilisation of membrane proteins in response to stress involves the concerted action of a rescue unit in the ER membrane comprised of SERP1/RAMP4, other components of the translocon, and molecular chaperones in the ER.
Bgt-3520	9.88e-82	236.842	PTZ00160	cl12022	Ribosome/Translation	Ribosomal proteins 50S-L15, 50S-L18e, 60S-L27A. This family includes higher eukaryotic ribosomal 60S L27A, archaeal 50S L18e, prokaryotic 50S L15, fungal mitochondrial L10, plant L27A, mitochondrial L15 and chloroplast L18-3 proteins.
Bgt-2341	4.32e-46	142.538	PTZ00255	cl19284	Ribosome/Translation	Ribosomal L37ae protein family. This ribosomal protein is found in archaebacteria and eukaryotes. It contains four conserved cysteine residues that may bind to zinc.
BgtA-20171	2.05e-22	80.3708	Ribosomal_S30	cl21569	Ribosome/Translation	Ribosomal protein S30
Bgt-3117	3.86e-06	44.5048	40S_SA_C superfamily	cl24635	Ribosome/Translation	40S ribosomal protein SA C-terminus. This domain is found at the C-terminus of 40S ribosomal protein SA.
Bgt-3819	1.07e-106	304.607	PTZ00148	cl25405	Ribosome/Translation	Ribosomal protein S8e
Bgt-1001	9.66e-146	410.999	Ribosomal_L5e superfamily	cl25476	Ribosome/Translation	Ribosomal large subunit proteins 60S L5, and 50S L18. This family contains the large 60S ribosomal L5 proteins from Eukaryota and the 50S L18 proteins from Archaea. It has been shown that the amino terminal 93 amino acids of Rat Rpl5 are necessary and sufficient to bind 5S rRNA in vitro, suggesting that the entire family has a function in rRNA binding.
Bgt-1376	5.34e-121	339.136	Ribosomal_L18	cl25479	Ribosome/Translation	Ribosomal protein 60S L18 and 50S L18e. This is a family of ribosomal proteins, 60S L18 from eukaryotes and 50S L18e from Archaea.
Bgt-3083	2.76e-88	254.625	PTZ00241	cl25697	Ribosome/Translation	Ribosomal_S17 N-terminal. This short N-terminal region is found in a number of higher eukaryotic ribosomal subunit 17 proteins.
Bgt-2426	1.19e-91	271.337	PTZ00365 superfamily	cl25795	Ribosome/Translation	60S ribosomal protein L7Ae-like; Provisional
Bgt-399	3.46e-175	493.166	Ribos_L4_asso_C superfamily	cl26029	Ribosome/Translation	60S ribosomal protein L4 C-terminal domain. This family is found at the very C-terminal of 60 ribosomal L4 proteins.
Bgt-1385	4.89e-08	49.3569	aMBF1 superfamily	cl26727	Ribosome/Translation	Archaeal ribosome-binding protein aMBF1, putative translation factor, contains Zn-ribbon and HTH domains [Translation, ribosomal structure and biogenesis]
Bgt-3218	6.63e-153	426.052	PLN00036	cl26806	Ribosome/Translation	Ribosomal family S4e
Bgt-1643	1.05e-100	285.02	PTZ00072	cl26807	Ribosome/Translation	Ribosomal S13/S15 N-terminal domain. This domain is found at the N-terminus of ribosomal S13 and S15 proteins. This domain is also identified as NUC021.
Bgt-3005	7.98e-150	417.983	Ribosomal_L2_C superfamily	cl27214	Ribosome/Translation	Ribosomal Proteins L2, C-terminal domain
Bgt-63	2.29e-88	255.118	PLN03072	cl27216	Ribosome/Translation	Ribosomal protein L11. Ribosomal protein L11, together with proteins L10 and L7/L12, and 23S rRNA, form the L7/L12 stalk on the surface of the large subunit of the ribosome. The homologous eukaryotic cytoplasmic protein is also called 60S ribosomal protein L12, which is distinct from the L12 involved in the formation of the L7/L12 stalk. The C-terminal domain (CTD) of L11 is essential for binding…
Bgt-4423	2.54e-43	139.835	PTZ00191	cl27217	Ribosome/Translation	Ribosomal protein L23, N-terminal domain. The N-terminal domain appears to be specific to the eukaryotic ribosomal proteins L25, L23, and L23a.
Bgt-1050	1.5e-25	94.1156	F1-ATPase_delta	cl27350	Ribosome/Translation	mitochondrial ATP synthase delta subunit. The F-ATPase is found in bacterial plasma membranes, mitochondrial inner membranes and in chloroplast thylakoid membranes. It has also been found in the archaea Methanosarcina barkeri. It uses a proton gradient to drive ATP synthesis and hydrolyzes ATP to build the proton gradient. The extrinisic membrane domain, F1, is composed of alpha, beta, gamma, del…
Bgt-305	1.43e-36	120.272	Ribosomal_L14e	cl27476	Ribosome/Translation	Ribosomal protein L14
Bgt-2258	7.83e-15	60.6336	Ribosomal_L29e	cl27501	Ribosome/Translation	Ribosomal L29e protein family
Bgt-706	1.94e-134	379.42	Ribosomal_S5 superfamily	cl27712	Ribosome/Translation	Ribosomal protein S5, N-terminal domain
Bgt-1091	4e-115	323.531	PTZ00156	cl27722	Ribosome/Translation	Ribosomal protein L5
Bgt-1395	1.12e-135	382.089	PTZ00084	cl27732	Ribosome/Translation	Ribosomal protein S3, C-terminal domain. This family contains a central domain pfam00013, hence the amino and carboxyl terminal domains are stored separately. This is a minimal carboxyl-terminal domain. Some are much longer.
Bgt-3712	1.77e-98	282.353	PTZ00155	cl27739	Ribosome/Translation	Ribosomal protein S4/S9 N-terminal domain. This family includes small ribosomal subunit S9 from prokaryotes and S16 from metazoans. This domain is predicted to bind to ribosomal RNA. This domain is composed of four helices in the known structure. However the domain is discontinuous in sequence and the alignment for this family contains only the first three helices.
Bgt-2350	3.18e-70	211.166	Ribosomal_L6 superfamily	cl28155	Ribosome/Translation	Ribosomal protein L6
Bgt-3217	1.26e-75	224.151	Ribosomal_L19e_E	cl00232	Ribosome/Translation	Ribosomal protein L19e. L19e is found in the large ribosomal subunit of eukaryotes and archaea. L19e is distinct from the ribosomal subunit L19, which is found in prokaryotes. It consists of two small globular domains connected by an extended segment. It is located toward the surface of the large subunit, with one exposed end involved in forming the intersubunit bridge with the small subunit. The…
Bgt-2208	6.41e-131	365.723	uS7_Eukaryote	cl00313	Ribosome/Translation	uS7, also known as Ribosomal protein (RP)S7, is an important part of the translation process which is universally present in the small subunit of prokaryotic and eukaryotic ribosomes. The ribosome small subunit is one of the two subunits of ribosome organelles that use mRNA as a template for protein synthesis in a process called translation. The small subunits of bacteria and eukaryotes have the …
Bgt-1709	8.65e-50	154.202	Ribosomal_S10 superfamily	cl00314	Ribosome/Translation	This family includes small ribosomal subunit S10 from prokaryotes and S20 from eukaryotes.
Bgt-3232	3.47e-23	82.0401	Ribosomal_S14 superfamily	cl00355	Ribosome/Translation	This family includes both ribosomal S14 from prokaryotes and S29 from eukaryotes.
Bgt-5180	1.87e-31	105.499	Ribosomal_L40e	cl00671	Ribosome/Translation	Ribosomal L40e family. Bovine L40 has been identified as a secondary RNA binding protein. L40 is fused to a ubiquitin protein.
Bgt-3231	8.94e-59	175.357	Ribosomal_L35Ae	cl01033	Ribosome/Translation	Ribosomal protein L35Ae
Bgt-1229	1.23e-08	47.3717	Ribosomal_L29	cl09943	Ribosome/Translation	Ribosomal L29 protein/HIP. L29 is a protein of the large ribosomal Subunit. A homolog, called heparin/heparan sulfate interacting protein (HIP), has also been identified in mammals. L29 is located on the surface of the large ribosomal subunit, where it participates in forming a protein ring that surrounds the polypeptide exit channel, providing structural support for the ribosome. L29 is involved…
Bgt-3424	7.18e-120	346.62	rplP0 superfamily	cl25391	Ribosome/Translation	acidic ribosomal protein P0; Validated
Bgt-2019	6.19e-144	399.792	PTZ00173	cl00353	Ribosome/Translation	Ribosomal_L16_L10e: L16 is an essential protein in the large ribosomal subunit of bacteria, mitochondria, and chloroplasts. Large subunits that lack L16 are defective in peptidyl transferase activity, peptidyl-tRNA hydrolysis activity, association with the 30S subunit, binding of aminoacyl-tRNA and interaction with antibiotics. L16 is required for the function of elongation factor P (EF-P), a pro…
Bgt-3360	1.8e-18	78.7895	RRM	cl17169	RNA processing	RNA recognition motif (RRM) superfamily. RRM, also known as RBD (RNA binding domain) or RNP (ribonucleoprotein domain), is a highly abundant domain in eukaryotes found in proteins involved in post-transcriptional gene expression processes including mRNA and rRNA processing, RNA export, and RNA stability. This domain is 90 amino acids in length and consists of a four-stranded beta-sheet packed aga…
Bgt-3360	9.33e-14	65.6927	RRM	cl17169	RNA processing	RNA recognition motif (RRM) superfamily. RRM, also known as RBD (RNA binding domain) or RNP (ribonucleoprotein domain), is a highly abundant domain in eukaryotes found in proteins involved in post-transcriptional gene expression processes including mRNA and rRNA processing, RNA export, and RNA stability. This domain is 90 amino acids in length and consists of a four-stranded beta-sheet packed aga…
Bgt-3016	4.87e-47	147.053	RRM_II_PABPs	cl17169	RNA processing	RNA recognition motif (RRM) superfamily. RRM, also known as RBD (RNA binding domain) or RNP (ribonucleoprotein domain), is a highly abundant domain in eukaryotes found in proteins involved in post-transcriptional gene expression processes including mRNA and rRNA processing, RNA export, and RNA stability. This domain is 90 amino acids in length and consists of a four-stranded beta-sheet packed aga…
Bgt-3321	1.24e-34	120.406	RRM_SF superfamily	cl17169	RNA processing	RNA recognition motif (RRM) superfamily. RRM, also known as RBD (RNA binding domain) or RNP (ribonucleoprotein domain), is a highly abundant domain in eukaryotes found in proteins involved in post-transcriptional gene expression processes including mRNA and rRNA processing, RNA export, and RNA stability. This domain is 90 amino acids in length and consists of a four-stranded beta-sheet packed aga…
Bgt-2360	2.44e-36	116.928	Sm_F	cl00259	RNA processing	The eukaryotic Sm and Sm-like (LSm) proteins associate with RNA to form the core domain of the ribonucleoprotein particles involved in a variety of RNA processing events including pre-mRNA splicing, telomere replication, and mRNA degradation. Members of this family share a highly conserved Sm fold containing an N-terminal helix followed by a strongly bent five-stranded antiparallel beta-sheet. Sm…
Bgt-2629	2.6e-34	110.649	RNA_pol_N	cl00712	RNA processing	RNA polymerases N / 8 kDa subunit
Bgt-1047	4.93e-19	71.8096	Nop10p	cl00977	RNA processing	Nucleolar RNA-binding protein, Nop10p family. Nop10p is a nucleolar protein that is specifically associated with H/ACA snoRNAs. It is essential for normal 18S rRNA production and rRNA pseudouridylation by the ribonucleoprotein particles containing H/ACA snoRNAs (H/ACA snoRNPs). Nop10p is probably necessary for the stability of these RNPs.
Bgt-760	6.23e-78	232.157	SodA	cl27368	ROS	Iron/manganese superoxide dismutases, C-terminal domain. superoxide dismutases (SODs) catalyze the conversion of superoxide radicals to hydrogen peroxide and molecular oxygen. Three evolutionarily distinct families of SODs are known, of which the Mn/Fe-binding family is one. In humans, there is a cytoplasmic Cu/Zn SOD, and a mitochondrial Mn/Fe SOD. C-terminal domain is a mixed alpha/beta fold.
Bgt-46-2	0	861.359	PRK09280	cl25576	secretion	Flagellar biosynthesis/type III secretory pathway ATPase [Cell motility, Intracellular trafficking, secretion, and vesicular transport]
Bgt-828	0	990.336	PRK09281	cl25576	secretion	Flagellar biosynthesis/type III secretory pathway ATPase [Cell motility, Intracellular trafficking, secretion, and vesicular transport]
Bgt-4906	0.00301686	39.1969	PLN03088 superfamily	cl26005	SGT1	SGT1, suppressor of G2 allele of SKP1; Provisional
BgtA-21407	3.78e-10	61.3413	PLN03088 superfamily	cl26005	SGT1	SGT1, suppressor of G2 allele of SKP1; Provisional
BgtA-21407	7.59e-10	61.5385	PLN03088 superfamily	cl26005	SGT1	SGT1, suppressor of G2 allele of SKP1; Provisional
Bgt-2815	1.17e-19	75.4666	NAC	cl27486	Transcription	NAC domain
Bgt-4024	8.28e-18	73.5406	NAC	cl27486	Transcription	NAC domain
BgtA-21169	6.17e-52	170.434	GST_C_EF1Bgamma_like	cl02776	transferase	C-terminal, alpha helical domain of the Glutathione S-transferase family. Glutathione S-transferase (GST) family, C-terminal alpha helical domain; a large, diverse group of cytosolic dimeric proteins involved in cellular detoxification by catalyzing the conjugation of glutathione (GSH) with a wide range of endogenous and xenobiotic alkylating agents, including carcinogens, therapeutic drugs, envi…
Bgt-2598	2.93e-21	84.0124	GST_C_family superfamily	cl02776	transferase	C-terminal, alpha helical domain of the Glutathione S-transferase family. Glutathione S-transferase (GST) family, C-terminal alpha helical domain; a large, diverse group of cytosolic dimeric proteins involved in cellular detoxification by catalyzing the conjugation of glutathione (GSH) with a wide range of endogenous and xenobiotic alkylating agents, including carcinogens, therapeutic drugs, envi…
Bgt-2040	8.4e-73	215.344	PRK03999 superfamily	cl28432	Translation	translation initiation factor IF-5A; Provisional
Bgt-4913	2.44e-09	52.1335	PRK03999 superfamily	cl28432	Translation	translation initiation factor IF-5A; Provisional
Bgt-2314	0	826.791	alpha_tubulin	cl10017	Tubulin	Tubulin protein family of FtsZ and CetZ-like. This family includes tubulin alpha-, beta-, gamma-, delta-, epsilon, and zeta-tubulins as well as FtsZ and CetZ, all of which are involved in polymer formation. Tubulin is the major component of microtubules, but also exists as a heterodimer and as a curved oligomer. Microtubules exist in all eukaryotic cells and are responsible for many functions, in…
BgtA-20703	1.25e-37	121.186	Sumo	cl00155	Ubiquitin	Ubiquitin homologs; Includes ubiquitin and ubiquitin-like proteins. Ubiquitin-mediated proteolysis is part of the regulated turnover of proteins required for controlling cell cycle progression. Other family members are protein modifiers that perform a wide range of functions. Ubiquitination usually results in a covalent bond between the C-terminus of ubiquitin and the epsilon-amino group of a sub…
Bgt-2407	9.49e-54	163.888	Ubiquitin	cl00155	Ubiquitin	Ubiquitin homologs; Includes ubiquitin and ubiquitin-like proteins. Ubiquitin-mediated proteolysis is part of the regulated turnover of proteins required for controlling cell cycle progression. Other family members are protein modifiers that perform a wide range of functions. Ubiquitination usually results in a covalent bond between the C-terminus of ubiquitin and the epsilon-amino group of a sub…
Bgt-5180	1.28e-49	152.332	Ubiquitin	cl00155	Ubiquitin	Ubiquitin homologs; Includes ubiquitin and ubiquitin-like proteins. Ubiquitin-mediated proteolysis is part of the regulated turnover of proteins required for controlling cell cycle progression. Other family members are protein modifiers that perform a wide range of functions. Ubiquitination usually results in a covalent bond between the C-terminus of ubiquitin and the epsilon-amino group of a sub…
Bgt-548	3.44e-16	67.973	UBQ superfamily	cl00155	Ubiquitin	Ubiquitin homologs; Includes ubiquitin and ubiquitin-like proteins. Ubiquitin-mediated proteolysis is part of the regulated turnover of proteins required for controlling cell cycle progression. Other family members are protein modifiers that perform a wide range of functions. Ubiquitination usually results in a covalent bond between the C-terminus of ubiquitin and the epsilon-amino group of a sub…
Bgt-3571	1.15e-88	254.674	UBCc superfamily	cl00154	Ubiquitin	Ubiquitin-conjugating enzyme E2, catalytic (UBCc) domain. This is part of the ubiquitin-mediated protein degradation pathway in which a thiol-ester linkage forms between a conserved cysteine and the C-terminus of ubiquitin and complexes with ubiquitin protein ligase enzymes, E3. This pathway regulates many fundamental cellular processes. There are also other E2s which form thiol-ester linkages wi…
Bgt-4024	1.11e-17	73.0411	UBA_NAC_euk	cl21463	Ubiquitin	UBA domain-like superfamily. The ubiquitin-associated (UBA) domain-like superfamily contains alpha-helical structural homology ubiquitin-binding domains, including UBA domains and coupling of ubiquitin conjugation to endoplasmic reticulum degradation (CUE) domains which share a common three-helical bundle architecture. UBA domains are commonly occurring sequence motifs found in proteins involved …
Bgt-4611	1.54e-19	74.4379	QCR10	cl24032	Ubiquitin	Ubiquinol-cytochrome-c reductase complex subunit (QCR10). The QCR10 family of proteins are a component of the ubiquinol-cytochrome c reductase complex (also known as complex III or cytochrome b-c1 complex). This complex is located on the inner mitochondrial membrane and it couples electron transfer from ubiquinol to cytochrome. This subunit (QCR10) is required for stable association of the iron-s…
Bgt-71	3.35e-166	475.052	E3_binding superfamily	cl27351	Ubiquitin	e3 binding domain. This family represents a small domain of the E2 subunit of 2-oxo-acid dehydrogenases responsible for the binding of the E3 subunit.
Bgt-627	0	637.26	HSPA4_like_NDB	cl17037		Nucleotide-Binding Domain of the sugar kinase/HSP70/actin superfamily. This superfamily includes the actin family, the HSP70 family of molecular chaperones and nucleotide exchange factors, the ROK (repressor, ORF, kinase) family, the hexokinase family, the FGGY family (which includes glycerol kinase and similar carbohydrate kinases such as rhamnulokinase and xylulokinase), the exopolyphosphatase/…
BgtASP-20649	0	749.523	HSPA5-like_NBD	cl17037		Nucleotide-Binding Domain of the sugar kinase/HSP70/actin superfamily. This superfamily includes the actin family, the HSP70 family of molecular chaperones and nucleotide exchange factors, the ROK (repressor, ORF, kinase) family, the hexokinase family, the FGGY family (which includes glycerol kinase and similar carbohydrate kinases such as rhamnulokinase and xylulokinase), the exopolyphosphatase/…
Bgt-1486	0	727.264	NBD_sugar-kinase_HSP70_actin superfamily	cl17037		Nucleotide-Binding Domain of the sugar kinase/HSP70/actin superfamily. This superfamily includes the actin family, the HSP70 family of molecular chaperones and nucleotide exchange factors, the ROK (repressor, ORF, kinase) family, the hexokinase family, the FGGY family (which includes glycerol kinase and similar carbohydrate kinases such as rhamnulokinase and xylulokinase), the exopolyphosphatase/…
Bgt-1295	0.00460725	33.1093	YbbN superfamily	cl27119		Negative regulator of GroEL, contains thioredoxin-like and TPR-like domains [Posttranslational modification, protein turnover, chaperones]
Bgt-1295-2	4.94e-116	346.662	YbbN superfamily	cl27119		Negative regulator of GroEL, contains thioredoxin-like and TPR-like domains [Posttranslational modification, protein turnover, chaperones]
Bgt-1053	3.42e-07	42.3213	G-gamma	cl00069		G protein gamma subunit-like motifs, the alpha-helical G-gamma chain dimerizes with the G-beta propeller subunit as part of the heterotrimeric G-protein complex; involved in signal transduction via G-protein-coupled receptors
Bgt-349	7.39e-30	100.395	HMGB-UBF_HMG-box	cl00082		High Mobility Group (HMG)-box is found in a variety of eukaryotic chromosomal proteins and transcription factors. HMGs bind to the minor groove of DNA and have been classified by DNA binding preferences. Two phylogenically distinct groups of Class I proteins bind DNA in a sequence specific fashion and contain a single HMG box. One group (SOX-TCF) includes transcription factors, TCF-1, -3, -4; and…
Bgt-1223	2.33e-126	365.577	ribokinase_pfkB_like superfamily	cl00192		ribokinase/pfkB superfamily: Kinases that accept a wide variety of substrates, including carbohydrates and aromatic small molecules, all are phosphorylated at a hydroxyl group. The superfamily includes ribokinase, fructokinase, ketohexokinase, 2-dehydro-3-deoxygluconokinase, 1-phosphofructokinase, the minor 6-phosphofructokinase (PfkB), inosine-guanosine kinase, and adenosine kinase. Even though …
Bgt-2598	1.95e-38	127.91	EF1_GNE	cl00194		Elongation factor 1 beta (EF1B) guanine nucleotide exchange domain. EF1B catalyzes the exchange of GDP bound to the G-protein, EF1A, for GTP, an important step in the elongation cycle of the protein biosynthesis. EF1A binds to and delivers the aminoacyl tRNA to the ribosome. The guanine nucleotide exchange domain of EF1B, which is the alpha subunit in yeast, is responsible for the catalysis of th…
Bgt-13	4.78e-51	167.109	MIP superfamily	cl00200		Major intrinsic protein (MIP) superfamily. Members of the MIP superfamily function as membrane channels that selectively transport water, small neutral molecules, and ions out of and between cells. The channel proteins share a common fold: the N-terminal cytosolic portion followed by six transmembrane helices, which might have arisen through gene duplication. On the basis of sequence similarity a…
Bgt-2612	2.91e-107	312.074	pyrophosphatase superfamily	cl00217		Inorganic pyrophosphatase. These enzymes hydrolyze inorganic pyrophosphate (PPi) to two molecules of orthophosphates (Pi). The reaction requires bivalent cations. The enzymes in general exist as homooligomers.
Bgt-1138	3.69e-23	84.9068	ACBP	cl00221		Acyl CoA binding protein (ACBP) binds thiol esters of long fatty acids and coenzyme A in a one-to-one binding mode with high specificity and affinity. Acyl-CoAs are important intermediates in fatty lipid synthesis and fatty acid degradation and play a role in regulation of intermediary metabolism and gene regulation. The suggested role of ACBP is to act as a intracellular acyl-CoA transporter and…
Bgt-5483	1.22e-38	125.33	eIF1_SUI1_like superfamily	cl00229		Members of the eIF1/SUI1 (eukaryotic initiation factor 1) family are found in eukaryotes, archaea, and some bacteria; eukaryotic members are understood to play an important role in accurate initiator codon recognition during translation initiation. eIF1 interacts with 18S rRNA in the 40S ribosomal subunit during eukaryotic translation initiation. Point mutations in the yeast eIF1 implicate the pr…
BgtA-20271	3.94e-87	252.336	NDPk superfamily	cl00335		Nucleoside diphosphate kinases (NDP kinases, NDPks): NDP kinases, responsible for the synthesis of nucleoside triphosphates (NTPs), are involved in numerous regulatory processes associated with proliferation, development, and differentiation. They are vital for DNA/RNA synthesis, cell division, macromolecular metabolism and growth. The enzymes generate NTPs or their deoxy derivatives by terminal …
Bgt-703	0	853.969	CS_ACL-C_CCL superfamily	cl00416		Citrate synthase (CS), citryl-CoA lyase (CCL), the C-terminal portion of the single-subunit type ATP-citrate lyase (ACL) and the C-terminal portion of the large subunit of the two-subunit type ACL. CS catalyzes the condensation of acetyl coenzyme A (AcCoA) and oxalacetate (OAA) from citrate and coenzyme A (CoA), the first step in the oxidative citric acid cycle (TCA or Krebs cycle). Peroxisomal C…
BgtA-20725	6.22e-166	467.264	Iso_dh superfamily	cl00445		Isocitrate/isopropylmalate dehydrogenase
Bgt-960	1.14e-99	294.674	BI-1-like superfamily	cl00473		BAX inhibitor (BI)-1/YccA-like protein family. Mammalian members of the BAX inhibitor (BI)-1 like family of small transmembrane proteins have been shown to have an antiapoptotic effect either by stimulating the antiapoptotic function of Bcl-2, a well-characterized oncogene, or by inhibiting the proapoptotic effect of Bax, another member of the Bcl-2 family. Their broad tissue distribution and hig…
Bgt-4253	6.45e-15	61.1873	Sss1	cl00481		SecE/Sec61-gamma subunits of protein translocation complex. SecE is part of the SecYEG complex in bacteria which translocates proteins from the cytoplasm. In eukaryotes the complex, made from Sec61-gamma and Sec61-alpha translocates protein from the cytoplasm to the ER. Archaea have a similar complex.
Bgt-2168	3.13e-100	301.615	Membrane-FADS-like superfamily	cl00615		The membrane fatty acid desaturase (Membrane_FADS)-like CD includes membrane FADSs, alkane hydroxylases, beta carotene ketolases (CrtW-like), hydroxylases (CrtR-like), and other related proteins. They are present in all groups of organisms with the exception of archaea. Membrane FADSs are non-heme, iron-containing, oxygen-dependent enzymes involved in regioselective introduction of double bonds i…
Bgt-183	1.63e-84	246.703	Rieske_cytochrome_bc1	cl00938		Rieske domain; a [2Fe-2S] cluster binding domain commonly found in Rieske non-heme iron oxygenase (RO) systems such as naphthalene and biphenyl dioxygenases, as well as in plant/cyanobacterial chloroplast b6f and mitochondrial cytochrome bc(1) complexes. The Rieske domain can be divided into two subdomains, with an incomplete six-stranded, antiparallel beta-barrel at one end, and an iron-sulfur c…
Bgt-3700	6.83e-13	59.6787	YCII superfamily	cl00999		YCII-related domain. The majority of proteins in this family consist of a single copy of this domain, though it is also found as a repeat. A strongly conserved histidine and a aspartate suggest that the domain has an enzymatic function. This family also now includes the family formerly known as the DGPF domain (COG3795). Although its function is unknown it is found fused to a sigma-70 factor fami…
Bgt-1235	8.72e-19	74.9481	SCP2	cl01225		SCP-2 sterol transfer family. This domain is involved in binding sterols. It is found in the SCP2 protein, as well as the C terminus of the enzyme estradiol 17 beta-dehydrogenase EC:1.1.1.62. The UNC-24 protein contains an SPFH domain pfam01145.
Bgt-548	3.2e-10	51.5404	zf-AN1	cl01438		AN1-like Zinc finger. Zinc finger at the C-terminus of An1, a ubiquitin-like protein in Xenopus laevis. The following pattern describes the zinc finger. C-X2-C-X(9-12)-C-X(1-2)-C-X4-C-X2-H-X5-H-X-C Where X can be any amino acid, and numbers in brackets indicate the number of residues.
Bgt-1644	1.35e-170	481.136	TPP_enzymes superfamily	cl01629		Thiamine pyrophosphate (TPP) enzyme family, TPP-binding module; found in many key metabolic enzymes which use TPP (also known as thiamine diphosphate) as a cofactor. These enzymes include, among others, the E1 components of the pyruvate, the acetoin and the branched chain alpha-keto acid dehydrogenase complexes.
Bgt-3910	5.26e-56	170.379	S10_plectin	cl02102		Plectin/S10 domain. This presumed domain is found at the N-terminus of some isoforms of the cytoskeletal muscle protein plectin as well as the ribosomal S10 protein. This domain may be involved in RNA binding.
Bgt-1201	1.53e-101	290.259	Pho88	cl02110		Phosphate transport (Pho88). Members of this family of proteins are involved in regulating inorganic phosphate transport, as well as telomere length regulation and maintenance.
Bgt-2109	1.11e-13	60.9602	Tmemb_14	cl02346		Transmembrane proteins 14C.
Bgt-5470	0	829.021	GroEL	cl02777		chaperonin_like superfamily. Chaperonins are involved in productive folding of proteins. They share a common general morphology, a double toroid of 2 stacked rings, each composed of 7-9 subunits. There are 2 main chaperonin groups. The symmetry of type I is seven-fold and they are found in eubacteria (GroEL) and in organelles of eubacterial descent (hsp60 and RBP). The symmetry of type II is eigh…
BgtASP-20100	0	567.554	Calreticulin	cl02828		Calreticulin family
BgtA-21367	8.1e-48	166.497	Tyrosinase	cl02830		Common central domain of tyrosinase. This family also contains polyphenol oxidases and some hemocyanins. Binds two copper ions via two sets of three histidines. This family is related to pfam00372.
BgtA-21169	9e-62	195.035	EF1G	cl02914		Elongation factor 1 gamma, conserved domain
Bgt-2950	7.14e-72	215.956	Rho_GDI	cl03454		RHO protein GDP dissociation inhibitor
Bgt-1531	2.49e-115	343.364	SUN superfamily	cl04292		Beta-glucosidase (SUN family). Members of this family include Nca3, Sun4 and Sim1. This is a family of yeast proteins, involved in a diverse set of functions (DNA replication, aging, mitochondrial biogenesis and cell septation). BGLA from Candida wickerhamii has been characterized as a Beta-glucosidase EC:3.2.1.21.
Bgt-4969	2.42e-32	112.372	Ctr	cl04417		Ctr copper transporter family. The redox active metal copper is an essential cofactor in critical biological processes such as respiration, iron transport, oxidative stress protection, hormone production, and pigmentation. A widely conserved family of high-affinity copper transport proteins (Ctr proteins) mediates copper uptake at the plasma membrane. A series of clustered methionine residues in …
Bgt-4674	2.57e-26	107.772	LanC_like superfamily	cl04955		Cyclases involved in the biosynthesis of lantibiotics, and similar proteins. LanC is the cyclase enzyme of the lanthionine synthetase. Lanthionine is a lantibiotic, a unique class of peptide antibiotics. They are ribosomally synthesized as a precursor peptide and then post-translationally modified to contain thioether cross-links called lanthionines (Lans) or methyllanthionines (MeLans), in addit…
BgtA-21139	4.14e-31	103.799	NDUF_B7	cl05311		NADH-ubiquinone oxidoreductase B18 subunit (NDUFB7). This family consists of several NADH-ubiquinone oxidoreductase B18 subunit proteins from different eukaryotic organisms. Oxidative phosphorylation is the well-characterized process in which ATP, the principal carrier of chemical energy of individual cells, is produced due to a mitochondrial proton gradient formed by the transfer of electrons fr…
Bgt-3447	3.91e-35	114.5	SPC12	cl05928		Microsomal signal peptidase 12 kDa subunit (SPC12). This family consists of several microsomal signal peptidase 12 kDa subunit proteins. Translocation of polypeptide chains across the endoplasmic reticulum (ER) membrane is triggered by signal sequences. Subsequently, signal recognition particle interacts with its membrane receptor and the ribosome-bound nascent chain is targeted to the ER where i…
Bgt-2865	5.9e-05	38.0052	CHCH	cl06008		CHCH domain. we have identified a conserved motif in the LOC118487 protein that we have called the CHCH motif. Alignment of this protein with related members showed the presence of three subgroups of proteins, which are called the S (Small), N (N-terminal extended) and C (C-terminal extended) subgroups. All three sub-groups of proteins have in common that they contain a predicted conserved [coile…
Bgt-1385	5.93e-26	93.4476	MBF1	cl07226		Multiprotein bridging factor 1. This domain is found in the multiprotein bridging factor 1 (MBF1) which forms a heterodimer with MBF2. It has been shown to make direct contact with the TATA-box binding protein (TBP) and interacts with Ftz-F1, stabilizing the Ftz-F1-DNA complex. It is also found in the endothelial differentiation-related factor (EDF-1). Human EDF-1 is involved in the repression of…
Bgt-3805	4.16e-76	234.41	COG5580	cl07747		Activator of Hsp90 ATPase, N-terminal. Members of this family, which are predominantly found in the protein 'Activator of Hsp90 ATPase' adopt a secondary structure consisting of an N-terminal alpha-helix leading into a four-stranded meandering antiparallel beta-sheet, followed by a C-terminal alpha-helix. The two helices are packed together, with the beta-sheet curving around them. They bind to t…
BgtASP-20303	6.54e-06	43.3259	Carbpep_Y_N superfamily	cl07861		Carboxypeptidase Y pro-peptide. This family is found at the N terminus of several carboxypeptidase Y proteins and contains a signal peptide and pro-peptide regions.
Bgt-1021	1.5e-84	245.497	TCTP	cl08291		Translationally controlled tumor protein
BgtA-21091	1.48e-39	128.169	NTF2	cl09109		Nuclear transport factor 2 (NTF2-like) superfamily. This family includes members of the NTF2 family, Delta-5-3-ketosteroid isomerases, Scytalone Dehydratases, and the beta subunit of Ring hydroxylating dioxygenases. This family is a classic example of divergent evolution wherein the proteins have many common structural details but diverge greatly in their function. For example, nuclear transport …
Bgt-4089	4.13e-37	120.229	Cpn10	cl09113		Chaperonin 10 Kd subunit (cpn10 or GroES); Cpn10 cooperates with chaperonin 60 (cpn60 or GroEL), an ATPase, to assist the folding and assembly of proteins and is found in eubacterial cytosol, as well as in the matrix of mitochondria and chloroplasts. It forms heptameric rings with a dome-like structure, forming a lid to the large cavity of the tetradecameric cpn60 cylinder and thereby tightly reg…
Bgt-2436	3e-12	59.6123	MAPEG	cl09190		MAPEG family. This family is has been called MAPEG (Membrane Associated Proteins in Eicosanoid and Glutathione metabolism). It includes proteins such as Prostaglandin E synthase. This enzyme catalyzes the synthesis of PGE2 from PGH2 (produced by cyclooxygenase from arachidonic acid). Because of structural similarities in the active sites of FLAP, LTC4 synthase and PGE synthase, substrates for eac…
Bgt-1183	0	602.093	ACAD superfamily	cl09933		Acyl-CoA dehydrogenase. Both mitochondrial acyl-CoA dehydrogenases (ACAD) and peroxisomal acyl-CoA oxidases (AXO) catalyze the alpha,beta dehydrogenation of the corresponding trans-enoyl-CoA by FAD, which becomes reduced. The reduced form of ACAD is reoxidized in the oxidative half-reaction by electron-transferring flavoprotein (ETF), from which the electrons are transferred to the mitochondrial …
Bgt-1682	1.09e-20	82.0534	PP-binding superfamily	cl09936		Phosphopantetheine attachment site. A 4'-phosphopantetheine prosthetic group is attached through a serine. This prosthetic group acts as a a 'swinging arm' for the attachment of activated fatty acid and amino-acid groups. This domain forms a four helix bundle. This family includes members not included in Prosite. The inclusion of these members is supported by sequence analysis and functional evid…
Bgt-4974	4.51e-80	250.99	CHS_like	cl09938		Condensing enzymes; Family of enzymes that catalyze a (decarboxylating or non-decarboxylating) Claisen-like condensation reaction. Members are share strong structural similarity, and are involved in the synthesis and degradation of fatty acids, and the production of polyketides, a diverse group of natural products.
Bgt-1823	1.67e-48	151.293	YjgF_YER057c_UK114_family superfamily	cl10015		YjgF, YER057c, and UK114 belong to a large family of proteins present in bacteria, archaea, and eukaryotes with no definitive function. The conserved domain is similar in structure to chorismate mutase but there is no sequence similarity and no functional connection. Members of this family have been implicated in isoleucine (Yeo7, Ibm1, aldR) and purine (YjgF) biosynthesis, as well as threonine a…
Bgt-222	2.78e-15	68.0872	GPI-anchored	cl11010		Ser-Thr-rich glycosyl-phosphatidyl-inositol-anchored membrane family. Some members of this family appear to be serine- threonine-rich membrane-anchored proteins, anchored by glycosyl-phosphatidylinositol. In A. fumigatus these proteins play a role in fungal cell wall organisation. In Lentinula edodes this family is involved in fruiting body formation, and may have a more general role in signallin…
Bgt-803	2.81e-50	157.628	PRK01202	cl11404		Biotinyl_lipoyl_domains are present in biotin-dependent carboxylases/decarboxylases, the dihydrolipoyl acyltransferase component (E2) of 2-oxo acid dehydrogenases, and the H-protein of the glycine cleavage system (GCS). These domains transport CO2, acyl, or methylamine, respectively, between components of the complex/protein via a biotinyl or lipoyl group, which is covalently attached to a highly…
Bgt-2191	1.25e-09	48.2308	zf-met2 superfamily	cl15156		Zinc-binding. This is small family of metazoan zinc-binding proteins.
Bgt-536-2	1.02e-48	150.19	SelR	cl15841		SelR domain. Methionine sulfoxide reduction is an important process, by which cells regulate biological processes and cope with oxidative stress. MsrA, a protein involved in the reduction of methionine sulfoxides in proteins, has been known for four decades and has been extensively characterized with respect to structure and function. However, recent studies revealed that MsrA is only specific fo…
Bgt-2284	2.47e-74	220.903	RanBD_RanBP1	cl17171		Pleckstrin homology-like domain. The PH-like family includes the PH domain, both the Shc-like and IRS-like PTB domains, the ran-binding domain, the EVH1 domain, a domain in neurobeachin and the third domain of FERM. All of these domains have a PH fold, but lack significant sequence similarity. They are generally involved in targeting to protein to the appropriate cellular location or interacting …
Bgt-785	2.02e-150	421.835	speE	cl17173		S-adenosylmethionine-dependent methyltransferases (SAM or AdoMet-MTase), class I; AdoMet-MTases are enzymes that use S-adenosyl-L-methionine (SAM or AdoMet) as a substrate for methyltransfer, creating the product S-adenosyl-L-homocysteine (AdoHcy). There are at least five structurally distinct families of AdoMet-MTases, class I being the largest and most diverse. Within this class enzymes can be …
Bgt-733	0	593.299	PRK09261	cl17225		DAHP synthetase I family. Members of this family catalyze the first step in aromatic amino acid biosynthesis from chorismate. E-coli has three related synthetases, which are inhibited by different aromatic amino acids. This family also includes KDSA which has very similar catalytic activity but is involved in the first step of liposaccharide biosynthesis. The enzyme is also part of the shikimate …
BgtA-21407	5.21e-07	46.1066	STI1	cl17974		Heat shock chaperonin-binding motif
Bgt-1536	3.56e-40	131.167	FKBP_C	cl19519		FKBP-type peptidyl-prolyl cis-trans isomerase
Bgt-3126	9.93e-35	119.906	TB2_DP1_HVA22 superfamily	cl19882		TB2/DP1, HVA22 family. This family includes members from a wide variety of eukaryotes. It includes the TB2/DP1 (deleted in polyposis) protein, which in humans is deleted in severe forms of familial adenomatous polyposis, an autosomal dominant oncological inherited disease. The family also includes the plant protein of known similarity to TB2/DP1, the HVA22 abscisic acid-induced protein, which is …
Bgt-4229	4.25e-131	370.013	PTZ00333	cl21457		Members of the ICL/PEPM_KPHMT enzyme superfamily catalyze the formation and cleavage of either P-C or C-C bonds. Typical members are phosphoenolpyruvate mutase (PEPM), phosphonopyruvate hydrolase (PPH), carboxyPEP mutase (CPEP mutase), oxaloacetate hydrolase (OAH), isocitrate lyase (ICL), 2-methylisocitrate lyase (MICL), and ketopantoate hydroxymethyltransferase (KPHMT).
Bgt-4899	0	865.001	HAD_like superfamily	cl21460		Haloacid Dehalogenase-like Hydrolases. The haloacid dehalogenase (HAD) superfamily includes carbon and phosphorus hydrolases such as 2-haloalkonoate dehalogenase, epoxide hydrolase, phosphoserine phosphatase, phosphomannomutase, phosphoglycolate phosphatase, P-type ATPase, among others. These proteins catalyze nucleophilic substitution reactions at phosphorus or carbon centers, using a conserved …
Bgt-5010	1.02e-13	70.9478	Sialidase_non-viral	cl21531		sialidases/neuraminidases. Sialidases or neuraminidases function to bind and hydrolyze terminal sialic acid residues from various glycoconjugates as well as playing roles in pathogenesis, bacterial nutrition and cellular interactions. They have a six-bladed beta-propeller fold. This hierarchy includes eubacterial, eukaryotic, and viral sialidases.
Bgt-2868	1.48e-81	236.582	PTZ00184	cl25352		The penta-EF hand (PEF) family. The penta-EF hand (PEF) family contains a group of five EF-hand calcium-binding proteins, including several classical calpain large catalytic subunits (CAPN1, 2, 3, 8, 9, 11, 12, 13, 14), two calpain small subunits (CAPNS1 and CAPNS2), as well as non-calpain PEF proteins, ALG-2 (apoptosis-linked gene 2, also termed programmed cell death protein 6, PDCD6), peflin, s…
Bgt-5033	1.25e-88	266.508	WD40	cl25539		WD40 domain, found in a number of eukaryotic proteins that cover a wide variety of functions including adaptor/regulatory modules in signal transduction, pre-mRNA processing and cytoskeleton assembly; typically contains a GH dipeptide 11-24 residues from its N-terminus and the WD dipeptide at its C-terminus and is 40 residues long, hence the name WD40; between GH and WD lies a conserved core; ser…
Bgt-845	3.57e-122	363.32	SucC superfamily	cl25712		Succinyl-CoA synthetase, beta subunit [Energy production and conversion]. linked to 3D-structure
BgtA-21407	3.78e-08	56.2452	TPR_11 superfamily	cl26002		TPR repeat
Bgt-4906	0.000232508	38.8742	TPR_16	cl26003		Tetratricopeptide repeat. This family is found predominantly at the C-terminus of transglutaminase enzyme core regions.
Bgt-704	0	891.48	Ligase_CoA superfamily	cl26126		CoA-ligase. This family includes the CoA ligases Succinyl-CoA synthetase alpha and beta chains, malate CoA ligase and ATP-citrate lyase. Some members of the family utilize ATP others use GTP.
Bgt-5274	1.43e-31	113.031	CLTH	cl26504		CTLH/CRA C-terminal to LisH motif domain. RanBPM is a scaffolding protein and is important in regulating cellular function in both the immune system and the nervous system. This domain is at the C-terminus of the proteins and is the binding domain for the CRA motif (for CT11-RanBPM), which is comprised of approximately 100 amino acids at the C terminal of RanBPM. It was found to be important for …
Bgt-5274	0.000114079	38.0579	LisH	cl26729		The LisH (lis homology) domain mediates protein dimerisation and tetramerisation. The LisH domain is found in Sif2, a component of the Set3 complex which is responsible for repressing meiotic genes. It has been shown that the LisH domain helps mediate interaction with components of the Set3 complex.
Bgt-3353	1.07e-154	426.801	PTZ00132	cl27030		Ras family. Includes sub-families Ras, Rab, Rac, Ral, Ran, Rap Ypt1 and more. Shares P-loop motif with GTP_EFTU, arf and myosin_head. See pfam00009 pfam00025, pfam00063. As regards Rab GTPases, these are important regulators of vesicle formation, motility and fusion. They share a fold in common with all Ras GTPases: this is a six-stranded beta-sheet surrounded by five alpha-helices.
Bgt-659	0	696.412	Enolase_N superfamily	cl27211		Enolase, N-terminal domain
Bgt-4948	0	976.692	TktA	cl27366		Transketolase [Carbohydrate transport and metabolism]. linked to 3D-structure
Bgt-744	0	672.498	PTZ00104	cl27369		S-adenosylmethionine synthetase, C-terminal domain. The three domains of S-adenosylmethionine synthetase have the same alpha+beta fold.
Bgt-729	5.87e-133	383.652	IlvC superfamily	cl27566		Acetohydroxy acid isomeroreductase, catalytic domain. Acetohydroxy acid isomeroreductase catalyzes the conversion of acetohydroxy acids into dihydroxy valerates. This reaction is the second in the synthetic pathway of the essential branched side chain amino acids valine and isoleucine.
Bgt-4181	0.000155397	44.0083	COG3942 superfamily	cl27702		Surface antigen [Cell wall/membrane/envelope biogenesis]
Bgt-701	0	807.614	Gnd	cl27703		6-phosphogluconate dehydrogenase, C-terminal domain. This family represents the C-terminal all-alpha domain of 6-phosphogluconate dehydrogenase. The domain contains two structural repeats of 5 helices each.
Bgt-2855	0	880.936	HSP90 superfamily	cl27733		Hsp90 protein
Bgt-4740	0	574.717	Gln-synt_C superfamily	cl27748		Glutamine synthetase, catalytic domain
Bgt-818	1.29e-176	500.832	Thiolase_N superfamily	cl27751		Thiolase, N-terminal domain. Thiolase is reported to be structurally related to beta-ketoacyl synthase (pfam00109), and also chalcone synthase.
Bgt-712	0	581.816	Gp_dh_N superfamily	cl27764		Glyceraldehyde 3-phosphate dehydrogenase, NAD binding domain. GAPDH is a tetrameric NAD-binding enzyme involved in glycolysis and glyconeogenesis. N-terminal domain is a Rossmann NAD(P) binding fold.
Bgt-2229	0	854.042	SelB superfamily	cl27768		Selenocysteine-specific translation elongation factor [Translation, ribosomal structure and biogenesis]
Bgt-1514	0	1568.12	PTZ00416	cl27769		Elongation factor Tu GTP binding domain
Bgt-1962	2.2e-109	328.318	DnaJ superfamily	cl28246		DnaJ-class molecular chaperone with C-terminal Zn finger domain [Posttranslational modification, protein turnover, chaperones]
Bgt-743	0	1229.21	PRK05222	cl28374		5-methyltetrahydropteroyltriglutamate--homocysteine S-methyltransferase; Provisional
BgtE-20076	0.00410831	35.0833	CAL1 superfamily	cl28545		Prenyltransferase, beta subunit [Posttranslational modification, protein turnover, chaperones, Lipid transport and metabolism]
Bgt-3378	1.27e-59	186.949	DUF5127	cl28841		Domain of unknown function (DUF5127)
Bgt-3378-2	2.16e-07	50.5882	DUF5127 superfamily	cl28841		Domain of unknown function (DUF5127)
Bgt-679	0	590.109	FBP_aldolase_IIA	cl28882		Fructose/tagarose-bisphosphate aldolase class II. This family includes fructose-1,6-bisphosphate (FBP) and tagarose 1,6-bisphosphate (TBP) aldolases. FBP-aldolase is homodimeric and used in gluconeogenesis and glycolysis; the enzyme controls the condensation of dihydroxyacetone phosphate with glyceraldehyde-3-phosphate to yield fructose-1,6-bisphosphate. TBP-aldolase is tetrameric and produces ta…
Bgt-2634	6.78e-57	183.839	NPD_like	cl28888		TIM barrel proteins share a structurally conserved phosphate binding motif and in general share an eight beta/alpha closed barrel structure. Specific for this family is the conserved phosphate binding site at the edges of strands 7 and 8. The phosphate comes either from the substrate, as in the case of inosine monophosphate dehydrogenase (IMPDH), or from ribulose-5-phosphate 3-epimerase (RPE) or …
Bgt-1446
Bgt-1555
Bgt-1582
Bgt-160
Bgt-20050
Bgt-2049
Bgt-20781
Bgt-2408
Bgt-2636
Bgt-2847
Bgt-297
Bgt-3370
Bgt-3530
Bgt-3565
Bgt-3791
Bgt-3821
Bgt-46
Bgt-4683
Bgt-5377
Bgt-5401
Bgt-5446
BgtA-20315
BgtAc-30982
BgtAc-31231
BgtASP-20866
BgtE-20078
BgtE-20080

## Sheet: Legend
Supplementary Table 4. Blast search results for the top5% highly expressed genes against the ncbi conserved domains database (CDD).
The protein sequences of the 5% most highly expressed genes (top5%) were used as query to Blast search the NCBI CDD database (https://www.ncbi.nlm.nih.gov/Structure/bwrpsb/bwrpsb.cgi).
1 Gene ID.
2 E-values of the blastx hits.
3 Bitscores of the blastx hits
4 Short names.
5 Superfamilies.
6 Functional groups.
7 Description of the hits found on ncbi.
