# Supplementary material for: Non-parent of Origin Expression of Numerous Effector Genes Indicates a Role of Gene Regulation in Host Adaption of the Hybrid Triticale Powdery Mildew Pathogen
Source: Front Plant Sci. 2018 Jan 30;9:49. doi: 10.3389/fpls.2018.00049 (PMC5797619; doi:10.3389/fpls.2018.00049)
Supplement: Supplementary file 3 [file Table7.xlsx]

## Sheet: SuppTable7
Geneid1	E-Value2	Bitscore3	Short name4	Superfamily5	Functional group6	Annotation NCBI7
Bgt-1468	0	643.908	DUF3292 superfamily	cl13194	-	Protein of unknown function (DUF3292)
Bgt-3496	6.93e-95	287.94	DUF2417	cl10998	-	Region of unknown function (DUF2417)
Bgt-545	6.53e-20	93.5804	COG5219 superfamily	cl26330	-	Uncharacterized conserved protein, contains RING Zn-finger [General function prediction only]
Bgt-4549	2.06e-10	58.868	Acetyltransf_4 superfamily	cl26093	Acetyltransferase	Acetyltransferase (GNAT) domain
BgtAc-30552	5.85e-10	63.9222	SMC_N superfamily	cl25732	Chromosome	RecF/RecN/SMC N terminal domain. This domain is found at the N terminus of SMC proteins. The SMC (structural maintenance of chromosomes) superfamily proteins have ATP-binding domains at the N- and C-termini, and two extended coiled-coil domains separated by a hinge in the middle. The eukaryotic SMC proteins form two kind of heterodimers: the SMC1/SMC3 and the SMC2/SMC4 types. These heterodimers c…
Bgt-404	7.15e-42	155.899	p450 superfamily	cl12078	Cytochrome	Cytochrome P450. Cytochrome P450s are haem-thiolate proteins involved in the oxidative degradation of various compounds. They are particularly well known for their role in the degradation of environmental toxins and mutagens. They can be divided into 4 classes, according to the method by which electrons from NAD(P)H are delivered to the catalytic site. Sequence conservation is relatively low with…
Bgt-20382					Effector
Bgt-2708					Effector
BgtAc-30142					Effector
BgtAc-30168					Effector
BgtAc-30688					Effector
BgtAc-30689					Effector
BgtAc-30857					Effector
BgtAc-30865					Effector
BgtAc-31108					Effector
BgtAc-31414					Effector
BgtAc-31552					Effector
BgtAcSP-30541					Effector
BgtAcSP-30749					Effector
BgtAcSP-31023					Effector
BgtAcSP-31098					Effector
BgtAcSP-31373					Effector
BgtAcSP-31482					Effector
BgtASP-20866					Effector
Bgt_avrF2_10					Effector
Bgt_avrF2_22					Effector
Bgt_avrF2_23					Effector
Bgt_avrF2_3					Effector
Bgt_BCG-1					Effector
Bgt_BCG-11					Effector
Bgt_BCG-6					Effector
Bgt_BCG-8					Effector
BgtE-10003					Effector
BgtE-10005					Effector
BgtE-10100					Effector
BgtE-10101					Effector
BgtE-10109					Effector
BgtE-20002					Effector
BgtE-20005					Effector
BgtE-20009					Effector
BgtE-20039					Effector
BgtE-20051					Effector
BgtE-20059					Effector
BgtE-20060					Effector
BgtE-20063					Effector
BgtE-20067					Effector
BgtE-20086					Effector
BgtE-20090					Effector
BgtE-20091					Effector
BgtE-20105					Effector
BgtE-20106					Effector
BgtE-20118					Effector
BgtE-20126					Effector
BgtE-20127					Effector
BgtE-292					Effector
BgtE-3419					Effector
BgtE-40000					Effector
BgtE-40006					Effector
BgtE-5547					Effector
BgtE-5560					Effector
BgtE-5564					Effector
BgtE-5627					Effector
BgtE-5630					Effector
BgtE-5728					Effector
BgtE-5752					Effector
BgtE-5756					Effector
BgtE-5774					Effector
BgtE-5846					Effector
BgtE-5967					Effector
BgtE-5996					Effector
Bgt-619	3.6e-08	54.0433	Abhydrolase_1 superfamily	cl26327	Hydrolase	alpha/beta hydrolase fold. This catalytic domain is found in a very wide range of enzymes.
Bgt-3496	0.000114901	43.8483	MhpC	cl26327	Hydrolase	alpha/beta hydrolase fold. This catalytic domain is found in a very wide range of enzymes.
Bgt-1220	6.34e-76	251.082	Abhydrolase superfamily	cl21494	Hydrolase	alpha/beta hydrolases. A functionally diverse superfamily containing proteases, lipases, peroxidases, esterases, epoxide hydrolases and dehalogenases. The catalytic apparatus typically involves three residues (catalytic triad): a serine, a glutamate or aspartate and a histidine, and often the mechanism involves a nucleophilic attack on a carbonyl carbon atom.
Bgt-836	7.8e-13	62.5743	Lipase_GDSL_2	cl01053	Hydrolase	SGNH_hydrolase, or GDSL_hydrolase, is a diverse family of lipases and esterases. The tertiary fold of the enzyme is substantially different from that of the alpha/beta hydrolase family and unique among all known hydrolases; its active site closely resembles the typical Ser-His-Asp(Glu) triad from other serine hydrolases, but may lack the carboxlic acid.
Bgt-1246	0	513.749	metallo-dependent_hydrolases superfamily	cl00281	Hydrolase	Superfamily of metallo-dependent hydrolases (also called amidohydrolase superfamily) is a large group of proteins that show conservation in their 3-dimensional fold (TIM barrel) and in details of their active site. The vast majority of the members have a conserved metal binding site, involving four histidines and one aspartic acid residue. In the common reaction mechanism, the metal ion (or ions)…
Bgt-3045	5.48e-13	61.9455	MARVEL	cl04571	Membrane	Membrane-associating domain. MARVEL domain-containing proteins are often found in lipid-associating proteins - such as Occludin and MAL family proteins. It may be part of the machinery of membrane apposition events, such as transport vesicle biogenesis.
Bgt-3347	0.000101465	39.9891	MARVEL	cl04571	Membrane	Membrane-associating domain. MARVEL domain-containing proteins are often found in lipid-associating proteins - such as Occludin and MAL family proteins. It may be part of the machinery of membrane apposition events, such as transport vesicle biogenesis.
BgtASP-21288	4.29e-19	74.3415	Pmp3	cl00431	Membrane	Proteolipid membrane potential modulator. Pmp3 is an evolutionarily conserved proteolipid in the plasma membrane which, in S. pombe, is transcriptionally regulated by the Spc1 stress MAPK (mitogen-activated protein kinases) pathway. It functions to modulate the membrane potential, particularly to resist high cellular cation concentration. In eukaryotic organisms, stress-activated mitogen-activate…
Bgt-5095	2.19e-101	325.163	Fmp27	cl11012	Mitochondrion	Mitochondrial protein from FMP27. This family contains mitochondrial FMP27 proteins which in yeasts together with SEN1 are long genes that exist in a looped conformation, effectively bringing together their promoter and terminator regions. Pol-II is located at both ends of FMP27 when this gene is transcribed from a GAL1 promoter under induced and non-induced conditions. The exact function of the …
BgtA-21539	4.78e-09	58.3004	Tht1 superfamily	cl26893	Nuclear fusion	Tht1-like nuclear fusion protein
Bgt-20028-2	0.000856828	37.017	PKc_like superfamily	cl21453	PKc_like Superfamily	Protein Kinases, catalytic domain. The protein kinase superfamily is mainly composed of the catalytic domains of serine/threonine-specific and tyrosine-specific protein kinases. It also includes RIO kinases, which are atypical serine protein kinases, aminoglycoside phosphotransferases, and choline kinases. These proteins catalyze the transfer of the gamma-phosphoryl group from ATP to hydroxyl gro…
Bgt-20099	0.00314104	38.0062	PKc_like superfamily	cl21453	PKc_like Superfamily	Protein Kinases, catalytic domain. The protein kinase superfamily is mainly composed of the catalytic domains of serine/threonine-specific and tyrosine-specific protein kinases. It also includes RIO kinases, which are atypical serine protein kinases, aminoglycoside phosphotransferases, and choline kinases. These proteins catalyze the transfer of the gamma-phosphoryl group from ATP to hydroxyl gro…
Bgt-54	9.46e-19	86.7655	PKc_like superfamily	cl21453	PKc_like Superfamily	Protein Kinases, catalytic domain. The protein kinase superfamily is mainly composed of the catalytic domains of serine/threonine-specific and tyrosine-specific protein kinases. It also includes RIO kinases, which are atypical serine protein kinases, aminoglycoside phosphotransferases, and choline kinases. These proteins catalyze the transfer of the gamma-phosphoryl group from ATP to hydroxyl gro…
Bgt-1283	0	561.3	AMS1	cl26658	Sugar metabolism	Alpha mannosidase middle domain. Members of this family adopt a structure consisting of three alpha helices, in an immunoglobulin/albumin-binding domain-like fold. They are predominantly found in the enzyme alpha-mannosidase.
Bgt-3010	2.13e-165	468.144	PRK02318	cl26800	Sugar metabolism	Mannitol dehydrogenase C-terminal domain
Bgt-1405	6.01e-17	74.2934	bZIP_YAP	cl21462	Transcription	Basic leucine zipper (bZIP) domain of bZIP transcription factors: a DNA-binding and dimerization domain. Basic leucine zipper (bZIP) factors comprise one of the most important classes of enhancer-type transcription factors. They act in networks of homo and heterodimers in the regulation of a diverse set of cellular processes including cell survival, learning and memory, lipid metabolism, and canc…
Bgt-3108	7.2e-20	81.073	bZIP_GCN4	cl21462	Transcription	Basic leucine zipper (bZIP) domain of bZIP transcription factors: a DNA-binding and dimerization domain. Basic leucine zipper (bZIP) factors comprise one of the most important classes of enhancer-type transcription factors. They act in networks of homo and heterodimers in the regulation of a diverse set of cellular processes including cell survival, learning and memory, lipid metabolism, and canc…
Bgt-677	7.73e-13	65.0046	ABC_trans_N	cl20552	Transporter	ABC-transporter extracellular N-terminal. This domain is found at the N-terminus of ABC-transporter proteins from fungi, plants to higher eukaryotes. It would appear to be an extracellular domain.
Bgt-2286-2	2.27e-44	152.16	Zip superfamily	cl00437	Transporter	ZIP Zinc transporter. The ZIP family consists of zinc transport proteins and many putative metal transporters. The main contribution to this family is from the Arabidopsis thaliana ZIP protein family these proteins are responsible for zinc uptake in the plant. Also found within this family are C. elegans proteins of unknown function which are annotated as being similar to human growth arrest indu…
Bgt-5079	9.32e-30	110.521	ANAPC1	cl15124		Anaphase-promoting complex subunit 1. Apc1 is the largest of the subunits of the anaphase-promoting complex or cyclosome. The anaphase-promoting complex is a multiprotein subunit E3 ubiquitin ligase complex that controls segregation of chromosomes and exit from mitosis in eukaryotes. Infection of human fibroblasts with human cytomegalovirus (HCMV) leads to cell cycle dysregulation, which is assoc…
Bgt-272	0.00400617	35.3318	ANAPC4_WD40 superfamily	cl14918		Anaphase-promoting complex subunit 4 WD40 domain. Apc4 contains an N-terminal propeller-shaped WD40 domain.The N-terminus of Afi1 serves to stabilize the union between Apc4 and Apc5, both of which lie towards the bottom-front of the APC,
BgtA-20773	0.00288351	33.8702	ABM superfamily	cl10022		Antibiotic biosynthesis monooxygenase. This domain is found in monooxygenases involved in the biosynthesis of several antibiotics by Streptomyces species. It's occurrence as a repeat in Streptomyces coelicolor SCO1909 is suggestive that the other proteins function as multimers. There is also a conserved histidine which is likely to be an active site residue.
Bgt-20913	0.00606535	35.5529	AIR1 superfamily	cl26705		Arginine methyltransferase-interacting protein, contains RING Zn-finger [Posttranslational modification, protein turnover, chaperones / Intracellular trafficking and secretion]
Bgt-54	0.000639459	43.3885	Atrophin-1 superfamily	cl26464		Atrophin-1 family. Atrophin-1 is the protein product of the dentatorubral-pallidoluysian atrophy (DRPLA) gene. DRPLA OMIM:125370 is a progressive neurodegenerative disorder. It is caused by the expansion of a CAG repeat in the DRPLA gene on chromosome 12p. This results in an extended polyglutamine region in atrophin-1, that is thought to confer toxicity to the protein, possibly through altering i…
Bgt-2136	8.71e-43	152.986	Bestrophin superfamily	cl01544		Bestrophin, RFP-TM, chloride channel. Bestrophin is a 68-kDa basolateral plasma membrane protein expressed in retinal pigment epithelial cells (RPE). It is encoded by the VMD2 gene, which is mutated in Best macular dystrophy, a disease characterized by a depressed light peak in the electrooculogram. VMD2 encodes a 585-amino acid protein with an approximate mass of 68 kDa which has been designated…
BgtA-20625	1.04e-06	48.374	C2 superfamily	cl14603		C2 domain. The C2 domain was first identified in PKC. C2 domains fold into an 8-standed beta-sandwich that can adopt 2 structural arrangements: Type I and Type II, distinguished by a circular permutation involving their N- and C-terminal beta strands. Many C2 domains are Ca2+-dependent membrane-targeting modules that bind a wide variety of substances including bind phospholipids, inositol polypho…
Bgt-49	0	762.899	MOR2-PAG1_N	cl16723		Cell morphogenesis N-terminal. This family is the conserved N-terminal region of proteins that are involved in cell morphogenesis.
BgtA-21571	3.19e-12	57.9695	Cgr1	cl23736		Cgr1 family. Members of this family are coiled-coil proteins that are involved in pre-rRNA processing.
Bgt-2307	1.38e-43	152.065	JmjC	cl21464		Conserved domain found in cupin and related proteins. A diverse protein domains superfamily which includes both metal-dependent and metal-independent enzymes, as well as catalytically inactive seed storage proteins
Bgt-125	6.19e-23	104.343	MutL superfamily	cl28386		DNA mismatch repair ATPase MutL [Replication, recombination and repair]
Bgt-125	4.25e-16	79.9923	MutL superfamily	cl28386		DNA mismatch repair ATPase MutL [Replication, recombination and repair]
BgtA-20625	8.74e-95	288.344	DOCK_N	cl24677		DOCK N-terminus. This family is found near to the N-terminus of dedicator of cytokinesis (DOCK) proteins, between the variant SH3 domain (pfam07653) and the C2 domain (pfam14429).
BgtA-20854	6.81e-125	406.578	DHC_N1	cl20356		Dynein heavy chain, N-terminal region 1. Dynein heavy chains interact with other heavy chains to form dimers, and with intermediate chain-light chain complexes to form a basal cargo binding unit. The region featured in this family includes the sequences implicated in mediating these interactions. It is thought to be flexible and not to adopt a rigid conformation.
Bgt-2922	1.61e-95	299.592	FAD_binding_3 superfamily	cl27552		FAD binding domain. This domain is involved in FAD binding in a number of enzymes.
Bgt-125	6.28e-19	83.9041	HATPase_c superfamily	cl00075		Fumarase C-terminus. This family consists of the C terminal region of several bacterial fumarate hydratase proteins (FumA and FumB). Fumarase, or fumarate hydratase (EC 4.2.1.2), is a component of the citric acid cycle. In facultative anaerobes such as Escherichia coli, fumarase also engages in the reductive pathway from oxaloacetate to succinate during anaerobic growth.
Bgt-1492	5.32e-100	297.099	STE2	cl03455		Fungal pheromone mating factor STE2 GPCR
Bgt-1216	3.14e-30	119.086	fungal_TF_MHR	cl23766		fungal transcription factor regulatory middle homology region. This domain is present in the large family of fungal zinc cluster transcription factors that contain an N-terminal GAL4-like C6 zinc binuclear cluster DNA-binding domain. Examples of members of this large fungal group are the following Saccharomyces cerevisiae transcription factors, GAL4, STB5, DAL81, CAT8, RDR1, HAL9, PUT3, PPR1, ASG…
Bgt-4861	1.29e-119	372.776	tRNA_lig_CPD superfamily	cl26784		Fungal tRNA ligase phosphodiesterase domain. This domain is found in fungal tRNA ligases and has cyclic phosphodiesterase activity. tRNA ligases are enzymes required for the splicing of precursor tRNA molecules containing introns.
Bgt-331	3.47e-19	72.731	Grg1	cl12601		Glucose-repressible protein Grg1. This fungal protein increases during glucose deprivation. Its function is unknown.
Bgt-1302	1.72e-27	101.684	Glyco_hydro_1 superfamily	cl23725		Glycosyl hydrolase family 1
Bgt-4556	5.83e-158	475.746	HBB superfamily	cl26947		Helical and beta-bridge domain. HBB is the domain on DEAD-box eukaryotic DNA repair helicases (EC:3.6.1.-) that appears to be a unique fold. It's conformation is of alpha-helices 12-16 plus a short beta-bridge to the FeS-cluster domain at the N-terminal. The full-length XPD protein verifies the presence of damage to DNA and allows DNA repair to proceed. XPD is an assembly of several domains to fo…
Bgt-2307	1.97e-12	61.4871	JmjN	cl15840		jmjN domain
Bgt-677	0	1245.77	PRK10535 superfamily	cl28180		macrolide transporter ATP-binding /permease protein; Provisional
Bgt-2464	3.51e-31	116.634	malate_synt superfamily	cl21481		Malate synthase catalyzes the Claisen condensation of glyoxylate and acetyl-CoA to malyl-CoA , which hydrolyzes to malate and CoA. This reaction is part of the glyoxylate cycle, which allows certain organisms, like plants and fungi, to derive their carbon requirements from two-carbon compounds, by bypassing the two carboxylation steps of the citric acid cycle.
Bgt-2984	1.4e-94	293.626	MBOAT superfamily	cl00738		MBOAT, membrane-bound O-acyltransferase family. The MBOAT (membrane bound O-acyl transferase) family of membrane proteins contains a variety of acyltransferase enzymes. A conserved histidine has been suggested to be the active site residue.
Bgt-3038	7.38e-59	184.303	HD_3	cl21469		Metal dependent phosphohydrolases with conserved 'HD' motif
BgtA-20854	0	633.949	MT superfamily	cl25937		Microtubule-binding stalk of dynein motor. the 380 kDa motor unit of dynein belongs to the AAA class of chaperone-like ATPases. The core of the 380 kDa motor unit contains a concatenated chain of six AAA modules, of which four correspond to the ATP binding sites with P-loop signatures described previously, and two are modules in which the P loop has been lost in evolution. This family is the regi…
Bgt-1214	1.19e-05	42.6481	NAT_SF	cl17182		N-Acyltransferase superfamily: Various enyzmes that characteristicly catalyze the transfer of an acyl group to a substrate. NAT (N-Acyltransferase) is a large superfamily of enzymes that mostly catalyze the transfer of an acyl group to a substrate and are implicated in a variety of functions, from bacterial antibiotic resistance to circadian rhythms in mammals. Members include GCN5-related N-Acet…
Bgt-468	7.08e-07	47.1194	Acetyltransf_1	cl17182		N-Acyltransferase superfamily: Various enyzmes that characteristicly catalyze the transfer of an acyl group to a substrate. NAT (N-Acyltransferase) is a large superfamily of enzymes that mostly catalyze the transfer of an acyl group to a substrate and are implicated in a variety of functions, from bacterial antibiotic resistance to circadian rhythms in mammals. Members include GCN5-related N-Acet…
Bgt-408	0	916.977	ALDH_F4-17_P5CDH	cl11961		NAD(P)+-dependent aldehyde dehydrogenase superfamily. The aldehyde dehydrogenase superfamily (ALDH-SF) of NAD(P)+-dependent enzymes, in general, oxidize a wide range of endogenous and exogenous aliphatic and aromatic aldehydes to their corresponding carboxylic acids and play an important role in detoxification. Besides aldehyde detoxification, many ALDH isozymes possess multiple additional cataly…
Bgt-763	0	540.484	ALDH_F18-19_ProA-GPR	cl11961		NAD(P)+-dependent aldehyde dehydrogenase superfamily. The aldehyde dehydrogenase superfamily (ALDH-SF) of NAD(P)+-dependent enzymes, in general, oxidize a wide range of endogenous and exogenous aliphatic and aromatic aldehydes to their corresponding carboxylic acids and play an important role in detoxification. Besides aldehyde detoxification, many ALDH isozymes possess multiple additional cataly…
Bgt-2307	2.16e-21	89.3424	PHD_SF superfamily	cl22851		PHD finger superfamily. The PHD finger superfamily includes a canonical plant homeodomain (PHD) finger typically characterized as Cys4HisCys3, and a non-canonical extended PHD finger, characterized as Cys2HisCys5HisCys2His. Variations include the RAG2 PHD finger characterized by Cys3His2Cys2His and the PHD finger 5 found in nuclear receptor-binding SET domain-containing proteins characterized by …
BgtA-20534	6.29e-41	144.974	STE3 superfamily	cl12261		Pheromone A receptor
Bgt-314	0	1548.79	PROCN superfamily	cl26804		PROCN (NUC071) domain. The PROCN domain is the central domain in pre-mRNA splicing factors of PRO8 family.
Bgt-2315	1.99e-08	54.9624	Rad17 superfamily	cl25702		Rad17 cell cycle checkpoint protein
Bgt-4615	4.36e-100	292.649	7tm_Opsin-1_euk	cl28897		seven-transmembrane G protein-coupled receptor superfamily. This hierarchical evolutionary model represents the seven-transmembrane (7TM) receptors, often referred to as G protein-coupled receptors (GPCRs), which transmit physiological signals from the outside of the cell to the inside via G proteins. GPCRs constitute the largest known superfamily of transmembrane receptors across the three kingd…
Bgt-1383	4.6e-55	182.981	SNF2_N superfamily	cl26465		SNF2 family N-terminal domain. This domain is found in proteins involved in a variety of processes including transcription regulation (e.g., SNF2, STH1, brahma, MOT1), DNA repair (e.g., ERCC6, RAD16, RAD5), DNA recombination (e.g., RAD54), and chromatin unwinding (e.g., ISWI) as well as a variety of other proteins with little functional information (e.g., lodestar, ETL1).
Bgt-2153	0.00669844	36.8237	Spc7 superfamily	cl25508		Spc7 kinetochore protein. This domain is found in cell division proteins which are required for kinetochore-spindle association.
Bgt-432	0.00268009	36.9826	TGS superfamily	cl25424		The TGS domain, named after the ThrRS, GTPase, and SpoT/RelA proteins where it occurs, is structurally similar to ubiquitin. TGS is a small domain of about 50 amino acid residues with a predominantly beta-sheet structure. There is no direct information on the function of the TGS domain, but its presence in two types of regulatory proteins (the GTPases and guanosine polyphosphate phosphohydrolases…
Bgt-2107	4.02e-44	156.999	THOC2_N superfamily	cl24644		THO complex subunit 2 N-terminus. This family represents the N-terminus of THO complex subunit 2.
BgtA-21282	0	664.847	TmcA	cl25451		tRNA-binding domain. This domain, found at the C-terminus of tRNA(Met) cytidine acyltransferase, may be involved in tRNA-binding. This family represents the tRNA-binding domain proteins not captured by pfam13725.
Bgt-20551-2	2.19e-05	38.9636	ZnF_C2HC	cl27759		Zinc knuckle. The zinc knuckle is a zinc binding motif composed of the the following CX2CX4HX4C where X can be any amino acid. The motifs are mostly from retroviral gag proteins (nucleocapsid). Prototype structure is from HIV. Also contains members involved in eukaryotic gene regulation, such as C. elegans GLH-1. Structure is an 18-residue zinc finger.
Bgt-432	2.93e-05	39.8477	zf-C2H2_jaz	cl26385		Zinc-finger double-stranded RNA-binding. This domain family is found in archaea and eukaryotes, and is approximately 30 amino acids in length. The mammalian members of this group occur multiple times along the protein, joined by flexible linkers, and are referred to as JAZ - dsRNA-binding ZF protein - zinc-fingers. The JAZ proteins are expressed in all tissues tested and localize in the nucleus, …
Bgt-1994
Bgt-20021
Bgt-20049
Bgt-20064
Bgt-20079
Bgt-20081
Bgt-20087
Bgt-20096
Bgt-20112
Bgt-20130
Bgt-20141
Bgt-20173
Bgt-20189
Bgt-20216
Bgt-20226
Bgt-20270
Bgt-20287
Bgt-20291
Bgt-20295
Bgt-20305
Bgt-20314
Bgt-20343
Bgt-20386
Bgt-20426
Bgt-20448
Bgt-20478
Bgt-20483
Bgt-20581
Bgt-20587
Bgt-20607
Bgt-20613
Bgt-20626
Bgt-20669
Bgt-20702
Bgt-20757
Bgt-20796
Bgt-20812
Bgt-20836
Bgt-20877
Bgt-20888
Bgt-20932
Bgt-20985
Bgt-20988
Bgt-2172
Bgt-2446
Bgt-3278
Bgt-4397
Bgt-4481
Bgt-4593-3
Bgt-499
Bgt-5135
Bgt-5478
BgtA-20041
BgtA-20354
BgtA-20579
BgtA-21008
BgtA-21149
BgtA-21224
BgtA-21573
BgtAc-30036
BgtAc-30187
BgtAc-30496
BgtAc-30640
BgtAc-30833
BgtAc-31239
BgtAc-31323
BgtAc-31413
BgtAc-31504
BgtAc-31565
BgtAcSP-31344
BgtE-20012
BgtE-20092
BgtE-20124
BgtE-5612
BgtE-5719

## Sheet: Legend
Supplementary Table 7. Blast search results for the genes differentially expressed between isolates of the same forma specialis against the ncbi conserved domains database (CDD).
The protein sequences of the genes differentially expressed between isolates of the same forma specialis were used as query to Blast search the NCBI CDD database (https://www.ncbi.nlm.nih.gov/Structure/bwrpsb/bwrpsb.cgi).
1 Gene ID.
2 E-values of the blastx hits.
3 Bitscores of the blastx hits
4 Short names.
5 Superfamilies.
6 Functional groups.
7 Description of the hits found on ncbi.
